# Supplementary material for: Invasive legumes can associate with many mutualists of native legumes, but usually do not
Source: PubMed Central journal article supplement (PMC5648655; doi:10.1002/ece3.3310), 2017-09-17
Supplement: ECE3-7-8599-s001.pdf [file ECE3-7-8599-s001.pdf]

## Supplemental Information

Table S1. List of isolate OTUs and Genbank accession numbers. Host species codes: ACGL=*Acmispon glaber*, ACHE=*A. heermannii*, ACMI=*A. micranthus*, ACST=*A. strigosus*, LUAR=*Lupinus arboreus*, LUBI=*L. bicolor*, GEMO=*Genista monspesulana*, SPJU=*Spartium junceum*, ULEU=*Ulex europaeus*. Collection site codes: BL=Bunnyland, Bodega Marine and Terrestrial Reserve, Bodega Bay, CA; BM=Boyd Memorial Park, San Rafael, CA; BD=Bodega Marine and Terrestrial Reserve, Bodega Bay, CA; CC=Cascade Canyon Open Space Preserve, Fairfax, CA; CR=Colliss Family Ranch, Bodega Bay, CA; GH=private property, Bodega Bay, CA; HH=Horse Hill Open Space Preserve, Mill Valley, CA; MP=Mussel Point, Bodega Marine and Terrestrial Reserve, Bodega Bay, CA; RR=Roys Redwoods Preserve, Woodacre, CA; RT=Romburg Tiburon Center, Tiburon, CA; SO=Sonoma, CA; VS=Sonoma Coast Villa and Spa, Bodega, CA; XR=Crossroads, Bodega Marine and Terrestrial Reserve, Bodega Bay, CA. Source codes: 1=current study, 2=Sachs et al. (2009), 3=Simms et al. (unpub. data), 4=Ehinger et al. (2014).

| Isolate | Host | Collection Site | OTU ID |     |      |        | Genbank Acc. No. |          |
|---------|------|-----------------|--------|-----|------|--------|------------------|----------|
|         |      |                 | conc   | ITS | nifD | Source | ITS              | nifD     |
| A02a    | GEMO | RTC             | 003    | 001 | 004  | 1      | MF477238         | MF477545 |
| A02b    | GEMO | RTC             | 004    | 003 | 007  | 1      | MF477239         | MF477546 |
| A03a    | GEMO | RTC             | 004    | 003 | 007  | 1      | MF477240         | MF477547 |
| A03b    | GEMO | RTC             | 003    | 003 | 004  | 1      | MF477241         | MF477548 |
| A04a    | GEMO | RTC             | 004    | 003 | 005  | 1      | MF477242         | MF477549 |
| A05a    | GEMO | RTC             | 003    | 001 | 004  | 1      | MF477244         | MF477550 |
| A05b    | GEMO | RTC             | 003    | 001 | 004  | 1      | MF477245         | MF477551 |
| A06a    | GEMO | RTC             | 003    | 001 | 005  | 1      | MF477246         | MF477552 |
| A06b    | GEMO | RTC             | 003    | 001 | 004  | 1      | MF477247         | MF477553 |
| A07a    | GEMO | RTC             | 004    | 003 | 007  | 1      | MF477248         | MF477554 |
| A07b    | GEMO | RTC             | 004    | 001 | 007  | 1      | MF477249         | MF477555 |
| A08b    | GEMO | RTC             | 005    | 004 | 005  | 1      | MF477251         | MF477556 |
| A09a    | GEMO | RTC             | 004    | 003 | 015  | 1      | MF477252         | MF477557 |
| A09b    | GEMO | RTC             | 004    | 003 | 005  | 1      | MF477253         | MF477558 |
| A10b    | GEMO | RTC             | 004    | 003 | 007  | 1      | MF477254         | MF477559 |
| A11a    | GEMO | RTC             | 004    | 001 | 007  | 1      | MF477255         | MF477560 |
| A11b    | GEMO | RTC             | 004    | 003 | 009  | 1      | MF477256         | MF477561 |
| B01b    | GEMO | RTC             | 003    | 001 | 008  | 1      | MF477257         | MF477562 |
| B02a    | GEMO | RTC             | 003    | 001 | 004  | 1      | MF477258         | MF477563 |
| B02b    | GEMO | RTC             | 003    | 001 | 015  | 1      | MF477259         | MF477564 |
| B03b    | GEMO | RTC             | 003    | 001 | 008  | 1      | MF477260         | MF477565 |
| B04a    | GEMO | RTC             | 006    | 008 | 005  | 1      | MF477261         | MF477566 |
| B04b    | GEMO | RTC             | 006    | 008 | 005  | 1      | MF477262         | MF477567 |
| B05a    | GEMO | RTC             | 003    | 001 | 008  | 1      | MF477263         | MF477568 |
| B06a    | GEMO | RTC             | 009    | 003 | 016  | 1      | MF477264         | MF477570 |
| B06b    | GEMO | RTC             | 003    | 003 | 004  | 1      | MF477265         | MF477571 |
| B07a    | GEMO | RTC             | 004    | 003 | 007  | 1      | MF477266         | MF477572 |
| B07b    | GEMO | RTC             | 004    | 003 | 009  | 1      | MF477267         | MF477573 |

Table S1. Continued from previous page.

| Isolate | Host | Collection Site | OTU ID |     |      | Source | Genbank Acc. No. |          |
|---------|------|-----------------|--------|-----|------|--------|------------------|----------|
|         |      |                 | conc   | ITS | nifD |        | ITS              | nifD     |
| B08a    | GEMO | RTC             | 003    | 001 | 008  | 1      | MF477268         | MF477574 |
| B09b    | GEMO | RTC             | 004    | 003 | 007  | 1      | MF477269         | MF477575 |
| B10a    | GEMO | RTC             | 004    | 003 | 007  | 1      | MF477270         | MF477576 |
| B10b    | GEMO | RTC             | 004    | 003 | 007  | 1      | MF477271         | MF477577 |
| C01a    | ULEU | CR              | 005    | 004 | 006  | 1      | MF477272         | MF477578 |
| C01b    | ULEU | CR              | 005    | 004 | 006  | 1      | MF477273         | MF477579 |
| C01c    | ULEU | CR              | 005    | 004 | 006  | 1      | MF477274         | MF477580 |
| C01d    | ULEU | CR              | 010    | 007 | 006  | 1      | MF477275         | MF477581 |
| C01e    | ULEU | CR              | 010    | 007 | 006  | 1      | MF477276         | MF477582 |
| C01f    | ULEU | CR              | 005    | 004 | 006  | 1      | MF477277         | MF477583 |
| C01g    | ULEU | CR              | 005    | 004 | 006  | 1      | MF477278         | MF477584 |
| C01h    | ULEU | CR              | 005    | 004 | 006  | 1      | MF477279         | MF477585 |
| C01i    | ULEU | CR              | 010    | 007 | 006  | 1      | MF477280         | MF477586 |
| C01j    | ULEU | CR              | 005    | 004 | 006  | 1      | MF477281         | MF477587 |
| C01k    | ULEU | CR              | 010    | 007 | 006  | 1      | MF477282         | MF477588 |
| D01a    | ULEU | CR              | 006    | 005 | 005  | 1      | MF477283         | MF477589 |
| D01b    | ULEU | CR              | 006    | 006 | 009  | 1      | MF477284         | MF477590 |
| D01c    | ULEU | CR              | 006    | 006 | 009  | 1      | MF477285         | MF477591 |
| D01d    | ULEU | CR              | 006    | 006 | 009  | 1      | MF477286         | MF477592 |
| D01e    | ULEU | CR              | 006    | 006 | 009  | 1      | MF477287         | MF477593 |
| D01g    | ULEU | CR              | 006    | 005 | 005  | 1      | MF477288         | MF477594 |
| D01h    | ULEU | CR              | 006    | 006 | 009  | 1      | MF477289         | MF477595 |
| D01i    | ULEU | CR              | 005    | 023 | 006  | 1      | MF477290         | MF477596 |
| D01j    | ULEU | CR              | 006    | 006 | 009  | 1      | MF477291         | MF477597 |
| D01k    | ULEU | CR              | 006    | 006 | 009  | 1      | MF477292         | MF477598 |
| D01l    | ULEU | CR              | 006    | 005 | 005  | 1      | MF477293         | MF477599 |
| D01m    | ULEU | CR              | 004    | 003 | 006  | 1      | MF477294         | MF477600 |
| D01n    | ULEU | CR              | 004    | 003 | 006  | 1      | MF477295         | MF477601 |
| D01o    | ULEU | CR              | 006    | 006 | 009  | 1      | MF477296         | MF477602 |
| D01p    | ULEU | CR              | 003    | 001 | 004  | 1      | MF477297         | MF477603 |
| E01b    | ULEU | CR              | 005    | 004 | 006  | 1      | MF477298         | MF477604 |
| E01c    | ULEU | CR              | 003    | 001 | 004  | 1      | MF477299         | MF477605 |
| E01d    | ULEU | CR              | 010    | 007 | 004  | 1      | MF477300         | MF477606 |
| E01e    | ULEU | CR              | 010    | 007 | 006  | 1      | MF477301         | MF477607 |
| E01f    | ULEU | CR              | 010    | 007 | 004  | 1      | MF477302         | MF477608 |
| E01i    | ULEU | CR              | 018    | 025 | 004  | 1      | MF477304         | MF477609 |
| F01b    | ULEU | CR              | 010    | 007 | 006  | 1      | MF477305         | MF477610 |
| F01c    | ULEU | CR              | 006    | 006 | 006  | 1      | MF477306         | MF477611 |
| H01b    | SPJU | CC              | 001    | 001 | 010  | 1      | MF477307         | MF477612 |
| H01c    | SPJU | CC              | 001    | 001 | 010  | 1      | MF477308         | MF477613 |
| H01d    | SPJU | CC              | 003    | 001 | 008  | 1      | MF477309         | MF477614 |
| H01e    | SPJU | CC              | 001    | 001 | 010  | 1      | MF477310         | MF477615 |
| H01f    | SPJU | CC              | 001    | 001 | 010  | 1      | MF477311         | MF477616 |
| H01h    | SPJU | CC              | 001    | 001 | 010  | 1      | MF477312         | MF477617 |

Table S1. Continued from previous page.

| Isolate | Host | Collection<br>Site | OTU ID |     |      | Source | Genbank Acc. No. |          |
|---------|------|--------------------|--------|-----|------|--------|------------------|----------|
|         |      |                    | conc   | ITS | nifD |        | ITS              | nifD     |
| H01i    | SPJU | CC                 | 003    | 001 | 015  | 1      | MF477313         | MF477618 |
| H01k    | SPJU | CC                 | 003    | 001 | 008  | 1      | MF477314         | MF477619 |
| H01l    | SPJU | CC                 | 003    | 001 | 015  | 1      | MF477315         | MF477620 |
| H01m    | SPJU | CC                 | 003    | 001 | 008  | 1      | MF477316         | MF477621 |
| H01n    | SPJU | CC                 | 001    | 001 | 010  | 1      | MF477317         | MF477622 |
| H01q    | SPJU | CC                 | 001    | 001 | 010  | 1      | MF477318         | MF477623 |
| H01r    | SPJU | CC                 | 003    | 001 | 015  | 1      | MF477319         | MF477624 |
| H01s    | SPJU | CC                 | 001    | 001 | 010  | 1      | MF477320         | MF477625 |
| H01t    | SPJU | CC                 | 001    | 001 | 010  | 1      | MF477321         | MF477626 |
| H01u    | SPJU | CC                 | 003    | 001 | 015  | 1      | MF477322         | MF477627 |
| H01v    | SPJU | CC                 | 001    | 001 | 010  | 1      | MF477323         | MF477628 |
| H01w    | SPJU | CC                 | 001    | 001 | 010  | 1      | MF477324         | MF477629 |
| I01a    | GEMO | CC                 | 003    | 001 | 004  | 1      | MF477325         | MF477630 |
| I01b    | GEMO | CC                 | 004    | 003 | 005  | 1      | MF477326         | MF477631 |
| I01c    | GEMO | CC                 | 004    | 003 | 005  | 1      | MF477327         | MF477632 |
| I01d    | GEMO | CC                 | 006    | 005 | 015  | 1      | MF477328         | MF477633 |
| I01e    | GEMO | CC                 | 003    | 001 | 008  | 1      | MF477329         | MF477634 |
| I01f    | GEMO | CC                 | 004    | 003 | 005  | 1      | MF477330         | MF477635 |
| I01g    | GEMO | CC                 | 003    | 001 | 004  | 1      | MF477331         | MF477636 |
| I01h    | GEMO | CC                 | 004    | 003 | 005  | 1      | MF477332         | MF477637 |
| I01i    | GEMO | CC                 | 003    | 001 | 004  | 1      | MF477333         | MF477638 |
| I01j    | GEMO | CC                 | 004    | 003 | 005  | 1      | MF477334         | MF477639 |
| I01k    | GEMO | CC                 | 004    | 003 | 005  | 1      | MF477335         | MF477640 |
| J01a    | GEMO | CC                 | 003    | 001 | 004  | 1      | MF477336         | MF477641 |
| J01b    | GEMO | CC                 | 003    | 001 | 004  | 1      | MF477337         | MF477642 |
| J01c    | GEMO | CC                 | 003    | 001 | 004  | 1      | MF477338         | MF477643 |
| J01d    | GEMO | CC                 | 003    | 016 | 004  | 1      | MF477339         | MF477644 |
| J01e    | GEMO | CC                 | 003    | 001 | 008  | 1      | MF477340         | MF477645 |
| J01f    | GEMO | CC                 | 003    | 016 | 004  | 1      | MF477341         | MF477646 |
| J01h    | GEMO | CC                 | 003    | 001 | 004  | 1      | MF477342         | MF477647 |
| J01i    | GEMO | CC                 | 003    | 001 | 004  | 1      | MF477343         | MF477648 |
| J01j    | GEMO | CC                 | 003    | 001 | 004  | 1      | MF477344         | MF477649 |
| J01k    | GEMO | CC                 | 006    | 008 | 005  | 1      | MF477345         | MF477650 |
| J01l    | GEMO | CC                 | 005    | 012 | 005  | 1      | MF477346         | MF477651 |
| J01n    | GEMO | CC                 | 001    | 001 | 010  | 1      | MF477347         | MF477652 |
| K01c    | SPJU | CC                 | 003    | 001 | 004  | 1      | MF477349         | MF477653 |
| K01d    | SPJU | CC                 | 003    | 001 | 008  | 1      | MF477350         | MF477654 |
| K01e    | SPJU | CC                 | 003    | 001 | 004  | 1      | MF477351         | MF477655 |
| K01f    | SPJU | CC                 | 003    | 001 | 008  | 1      | MF477352         | MF477656 |
| K01g    | SPJU | CC                 | 003    | 001 | 004  | 1      | MF477353         | MF477657 |
| K01h    | SPJU | CC                 | 003    | 001 | 004  | 1      | MF477354         | MF477658 |
| K01i    | SPJU | CC                 | 003    | 001 | 008  | 1      | MF477355         | MF477659 |
| K01j    | SPJU | CC                 | 003    | 001 | 008  | 1      | MF477356         | MF477660 |
| K01l    | SPJU | CC                 | 003    | 001 | 004  | 1      | MF477357         | MF477661 |

Table S1. Continued from previous page.

| Isolate | Host | Collection<br>Site | OTU ID |     |      | Source | Genbank Acc. No. |          |
|---------|------|--------------------|--------|-----|------|--------|------------------|----------|
|         |      |                    | conc   | ITS | nifD |        | ITS              | nifD     |
| K01m    | SPJU | CC                 | 003    | 001 | 004  | 1      | MF477358         | MF477662 |
| K01n    | SPJU | CC                 | 003    | 001 | 008  | 1      | MF477359         | MF477663 |
| K01o    | SPJU | CC                 | 003    | 001 | 004  | 1      | MF477360         | MF477664 |
| K01p    | SPJU | CC                 | 003    | 001 | 004  | 1      | MF477361         | MF477665 |
| K01q    | SPJU | CC                 | 003    | 001 | 004  | 1      | MF477362         | MF477666 |
| L01a    | GEMO | CC                 | 003    | 001 | 004  | 1      | MF477363         | MF477667 |
| L01b    | GEMO | CC                 | 005    | 004 | 005  | 1      | MF477364         | MF477668 |
| L01c    | GEMO | CC                 | 005    | 012 | 005  | 1      | MF477365         | MF477669 |
| L01d    | GEMO | CC                 | 005    | 004 | 005  | 1      | MF477366         | MF477670 |
| L01e    | GEMO | CC                 | 001    | 001 | 010  | 1      | MF477367         | MF477671 |
| L01f    | GEMO | CC                 | 005    | 004 | 005  | 1      | MF477368         | MF477672 |
| L01h    | GEMO | CC                 | 003    | 001 | 004  | 1      | MF477369         | MF477673 |
| L01i    | GEMO | CC                 | 003    | 001 | 008  | 1      | MF477370         | MF477674 |
| L01j    | GEMO | CC                 | 003    | 001 | 004  | 1      | MF477371         | MF477675 |
| L01k    | GEMO | CC                 | 004    | 003 | 005  | 1      | MF477372         | MF477676 |
| L01l    | GEMO | CC                 | 005    | 004 | 005  | 1      | MF477373         | MF477677 |
| L01m    | GEMO | CC                 | 003    | 001 | 005  | 1      | MF477374         | MF477678 |
| M01a    | ULEU | VS                 | 003    | 001 | 005  | 1      | MF477375         | MF477679 |
| M01b    | ULEU | VS                 | 007    | 001 | 013  | 1      | MF477376         | MF477680 |
| M01c    | ULEU | VS                 | 007    | 001 | 013  | 1      | MF477377         | MF477681 |
| M01d    | ULEU | VS                 | 007    | 001 | 013  | 1      | MF477378         | MF477682 |
| M01f    | ULEU | VS                 | 007    | 001 | 013  | 1      | MF477379         | MF477683 |
| M01g    | ULEU | VS                 | 007    | 001 | 013  | 1      | MF477380         | MF477684 |
| M01h    | ULEU | VS                 | 007    | 001 | 013  | 1      | MF477381         | MF477685 |
| M01i    | ULEU | VS                 | 007    | 001 | 013  | 1      | MF477382         | MF477686 |
| M01k    | ULEU | VS                 | 009    | 003 | 012  | 1      | MF477384         | MF477687 |
| M01l    | ULEU | VS                 | 007    | 001 | 013  | 1      | MF477385         | MF477688 |
| M01n    | ULEU | VS                 | 004    | 003 | 007  | 1      | MF477387         | MF477689 |
| M01o    | ULEU | VS                 | 004    | 003 | 007  | 1      | MF477388         | MF477690 |
| M01p    | ULEU | VS                 | 007    | 001 | 013  | 1      | MF477389         | MF477691 |
| M01q    | ULEU | VS                 | 007    | 001 | 013  | 1      | MF477390         | MF477692 |
| M01r    | ULEU | VS                 | 007    | 001 | 013  | 1      | MF477391         | MF477693 |
| M01s    | ULEU | VS                 | 007    | 001 | 013  | 1      | MF477392         | MF477694 |
| M01t    | ULEU | VS                 | 007    | 001 | 013  | 1      | MF477393         | MF477695 |
| N01a    | ULEU | GH                 | 004    | 003 | 007  | 1      | MF477394         | MF477696 |
| N01b    | ULEU | GH                 | 006    | 005 | 009  | 1      | MF477395         | MF477697 |
| N01c    | ULEU | GH                 | 006    | 005 | 009  | 1      | MF477396         | MF477698 |
| N01d    | ULEU | GH                 | 004    | 003 | 007  | 1      | MF477397         | MF477699 |
| N01e    | ULEU | GH                 | 004    | 003 | 007  | 1      | MF477398         | MF477700 |
| N01f    | ULEU | GH                 | 004    | 003 | 007  | 1      | MF477399         | MF477701 |
| N01g    | ULEU | GH                 | 006    | 005 | 009  | 1      | MF477400         | MF477702 |
| N01h    | ULEU | GH                 | 004    | 003 | 007  | 1      | MF477401         | MF477703 |
| N01i    | ULEU | GH                 | 004    | 003 | 007  | 1      | MF477402         | MF477704 |
| N01j    | ULEU | GH                 | 006    | 005 | 009  | 1      | MF477403         | MF477705 |

Table S1. Continued from previous page.

| Isolate | Host | Collection<br>Site | OTU ID |     |      | Source | Genbank Acc. No. |          |
|---------|------|--------------------|--------|-----|------|--------|------------------|----------|
|         |      |                    | conc   | ITS | nifD |        | ITS              | nifD     |
| N01k    | ULEU | GH                 | 004    | 003 | 007  | 1      | MF477404         | MF477706 |
| N01m    | ULEU | GH                 | 004    | 003 | 007  | 1      | MF477406         | MF477707 |
| N01n    | ULEU | GH                 | 004    | 003 | 007  | 1      | MF477407         | MF477708 |
| N01o    | ULEU | GH                 | 006    | 005 | 009  | 1      | MF477408         | MF477709 |
| N01p    | ULEU | GH                 | 004    | 003 | 007  | 1      | MF477409         | MF477710 |
| N01q    | ULEU | GH                 | 003    | 001 | 027  | 1      | MF477410         | MF477711 |
| N01t    | ULEU | GH                 | 004    | 003 | 007  | 1      | MF477413         | MF477712 |
| P01.1a  | ACGL | BM                 | 001    | 003 | 002  | 1      | MF477414         | MF477713 |
| P01.1b  | ACGL | BM                 | 001    | 003 | 002  | 1      | MF477415         | MF477714 |
| P01.1c  | ACGL | BM                 | 001    | 003 | 002  | 1      | MF477416         | MF477715 |
| P01.1d  | ACGL | BM                 | 001    | 003 | 002  | 1      | MF477417         | MF477716 |
| P01.1e  | ACGL | BM                 | 001    | 001 | 020  | 1      | MF477418         | MF477717 |
| P01.1f  | ACGL | BM                 | 001    | 001 | 002  | 1      | MF477419         | MF477718 |
| P01a    | GEMO | BM                 | 006    | 005 | 015  | 1      | MF477420         | MF477719 |
| P01b    | GEMO | BM                 | 004    | 003 | 005  | 1      | MF477421         | MF477720 |
| P01c    | GEMO | BM                 | 003    | 001 | 004  | 1      | MF477422         | MF477721 |
| P01d    | GEMO | BM                 | 003    | 001 | 024  | 1      | MF477423         | MF477722 |
| P01f    | GEMO | BM                 | 003    | 001 | 004  | 1      | MF477424         | MF477723 |
| P01h    | GEMO | BM                 | 003    | 001 | 004  | 1      | MF477426         | MF477724 |
| P01i    | GEMO | BM                 | 001    | 001 | 010  | 1      | MF477427         | MF477725 |
| P01j    | GEMO | BM                 | 001    | 001 | 010  | 1      | MF477428         | MF477726 |
| P01k    | GEMO | BM                 | 001    | 001 | 010  | 1      | MF477429         | MF477727 |
| P01l    | GEMO | BM                 | 001    | 001 | 010  | 1      | MF477430         | MF477728 |
| P01m    | GEMO | BM                 | 004    | 003 | 005  | 1      | MF477431         | MF477729 |
| P01n    | GEMO | BM                 | 005    | 004 | 011  | 1      | MF477432         | MF477730 |
| P01o    | GEMO | BM                 | 003    | 001 | 024  | 1      | MF477433         | MF477731 |
| P01p    | GEMO | BM                 | 003    | 001 | 004  | 1      | MF477434         | MF477732 |
| P01q    | GEMO | BM                 | 006    | 005 | 015  | 1      | MF477435         | MF477733 |
| P01t    | GEMO | BM                 | 001    | 001 | 010  | 1      | MF477436         | MF477734 |
| Q01a    | ULEU | BM                 | 004    | 001 | 011  | 1      | MF477437         | MF477735 |
| Q01b    | ULEU | BM                 | 005    | 004 | 011  | 1      | MF477438         | MF477736 |
| Q01d    | ULEU | BM                 | 005    | 004 | 011  | 1      | MF477439         | MF477737 |
| Q01e    | ULEU | BM                 | 003    | 001 | 004  | 1      | MF477440         | MF477738 |
| Q01f    | ULEU | BM                 | 005    | 004 | 011  | 1      | MF477441         | MF477739 |
| Q01g    | ULEU | BM                 | 005    | 004 | 011  | 1      | MF477442         | MF477740 |
| Q01h    | ULEU | BM                 | 005    | 004 | 011  | 1      | MF477443         | MF477741 |
| Q01j    | ULEU | BM                 | 005    | 004 | 011  | 1      | MF477444         | MF477742 |
| Q01l    | ULEU | BM                 | 005    | 004 | 011  | 1      | MF477445         | MF477743 |
| Q01m    | ULEU | BM                 | 005    | 004 | 011  | 1      | MF477446         | MF477744 |
| Q01n    | ULEU | BM                 | 005    | 004 | 011  | 1      | MF477447         | MF477745 |
| Q01o    | ULEU | BM                 | 005    | 004 | 011  | 1      | MF477448         | MF477746 |
| Q01p    | ULEU | BM                 | 004    | 001 | 011  | 1      | MF477449         | MF477747 |
| Q01r    | ULEU | BM                 | 005    | 004 | 011  | 1      | MF477450         | MF477748 |
| Q01s    | ULEU | BM                 | 005    | 004 | 011  | 1      | MF477451         | MF477749 |

Table S1. Continued from previous page.

| Isolate | Host | Collection<br>Site | OTU ID |     |      | Source | Genbank Acc. No. |          |
|---------|------|--------------------|--------|-----|------|--------|------------------|----------|
|         |      |                    | conc   | ITS | nifD |        | ITS              | nifD     |
| R01b    | ULEU | BM                 | 006    | 017 | 005  | 1      | MF477452         | MF477750 |
| R01c    | ULEU | BM                 | 004    | 003 | 006  | 1      | MF477453         | MF477751 |
| R01d    | ULEU | BM                 | 004    | 003 | 009  | 1      | MF477454         | MF477752 |
| R01e    | ULEU | BM                 | 004    | 003 | 009  | 1      | MF477455         | MF477753 |
| R01f    | ULEU | BM                 | 004    | 003 | 007  | 1      | MF477456         | MF477754 |
| R01g    | ULEU | BM                 | 004    | 003 | 011  | 1      | MF477457         | MF477755 |
| R01h    | ULEU | BM                 | 014    | 019 | 011  | 1      | MF477458         | MF477756 |
| R01j    | ULEU | BM                 | 006    | 008 | 011  | 1      | MF477459         | MF477757 |
| R01k    | ULEU | BM                 | 005    | 022 | 011  | 1      | MF477460         | MF477758 |
| R01l    | ULEU | BM                 | 004    | 003 | 006  | 1      | MF477461         | MF477759 |
| R01m    | ULEU | BM                 | 004    | 003 | 006  | 1      | MF477462         | MF477760 |
| R01n    | ULEU | BM                 | 006    | 008 | 011  | 1      | MF477463         | MF477761 |
| R01o    | ULEU | BM                 | 004    | 003 | 009  | 1      | MF477464         | MF477762 |
| R01p    | ULEU | BM                 | 004    | 003 | 007  | 1      | MF477465         | MF477763 |
| R01q    | ULEU | BM                 | 003    | 001 | 004  | 1      | MF477466         | MF477764 |
| R01r    | ULEU | BM                 | 004    | 003 | 007  | 1      | MF477467         | MF477765 |
| R01s    | ULEU | BM                 | 006    | 008 | 011  | 1      | MF477468         | MF477766 |
| R01t    | ULEU | BM                 | 004    | 003 | 006  | 1      | MF477469         | MF477767 |
| S01a    | GEMO | BM                 | 004    | 003 | 009  | 1      | MF477470         | MF477768 |
| S01b    | GEMO | BM                 | 004    | 003 | 009  | 1      | MF477471         | MF477769 |
| S01d    | GEMO | BM                 | 004    | 003 | 007  | 1      | MF477472         | MF477771 |
| S01e    | GEMO | BM                 | 004    | 003 | 006  | 1      | MF477473         | MF477772 |
| S01f    | GEMO | BM                 | 004    | 003 | 009  | 1      | MF477474         | MF477773 |
| S01j    | GEMO | BM                 | 004    | 003 | 009  | 1      | MF477476         | MF477775 |
| S01k    | GEMO | BM                 | 004    | 003 | 006  | 1      | MF477477         | MF477776 |
| S01l    | GEMO | BM                 | 004    | 003 | 009  | 1      | MF477478         | MF477777 |
| S01m    | GEMO | BM                 | 004    | 003 | 006  | 1      | MF477479         | MF477778 |
| S01n    | GEMO | BM                 | 004    | 003 | 009  | 1      | MF477480         | MF477779 |
| S01o    | GEMO | BM                 | 004    | 003 | 006  | 1      | MF477481         | MF477780 |
| S01p    | GEMO | BM                 | 004    | 003 | 006  | 1      | MF477482         | MF477781 |
| S01r    | GEMO | BM                 | 004    | 003 | 006  | 1      | MF477484         | MF477782 |
| S01s    | GEMO | BM                 | 004    | 003 | 006  | 1      | MF477485         | MF477783 |
| S01t    | GEMO | BM                 | 004    | 003 | 007  | 1      | MF477486         | MF477784 |
| V01c    | SPJU | HH                 | 004    | 003 | 018  | 1      | MF477487         | MF477785 |
| V01d    | SPJU | HH                 | 004    | 003 | 018  | 1      | MF477488         | MF477786 |
| V01e    | SPJU | HH                 | 001    | 001 | 010  | 1      | MF477489         | MF477787 |
| V01h    | SPJU | HH                 | 001    | 001 | 010  | 1      | MF477490         | MF477788 |
| V01i    | SPJU | HH                 | 017    | 024 | 015  | 1      | MF477491         | MF477789 |
| V01l    | SPJU | HH                 | 013    | 004 | 004  | 1      | MF477493         | MF477790 |
| V01m    | SPJU | HH                 | 004    | 003 | 018  | 1      | MF477494         | MF477791 |
| V01n    | SPJU | HH                 | 004    | 003 | 018  | 1      | MF477495         | MF477792 |
| V01o    | SPJU | HH                 | 013    | 004 | 004  | 1      | MF477496         | MF477793 |
| V01p    | SPJU | HH                 | 001    | 001 | 010  | 1      | MF477497         | MF477794 |
| V01r    | SPJU | HH                 | 001    | 001 | 026  | 1      | MF477498         | MF477795 |

Table S1. Continued from previous page.

| Isolate    | Host | Collection<br>Site | OTU ID |     |      | Source | Genbank Acc. No. |          |
|------------|------|--------------------|--------|-----|------|--------|------------------|----------|
|            |      |                    | conc   | ITS | nifD |        | ITS              | nifD     |
| V01t       | SPJU | HH                 | 004    | 003 | 018  | 1      | MF477500         | MF477796 |
| V01v       | SPJU | HH                 | 001    | 001 | 010  | 1      | MF477501         | MF477797 |
| V01w       | SPJU | HH                 | 004    | 003 | 018  | 1      | MF477502         | MF477798 |
| V01x       | SPJU | HH                 | 013    | 004 | 004  | 1      | MF477503         | MF477799 |
| W01b       | SPJU | HH                 | 003    | 001 | 004  | 1      | MF477505         | MF477800 |
| W01d       | SPJU | HH                 | 003    | 001 | 004  | 1      | MF477506         | MF477801 |
| W01e       | SPJU | HH                 | 003    | 001 | 004  | 1      | MF477507         | MF477802 |
| W01g       | SPJU | HH                 | 003    | 001 | 005  | 1      | MF477508         | MF477803 |
| W01l       | SPJU | HH                 | 003    | 001 | 004  | 1      | MF477509         | MF477804 |
| W01o       | SPJU | HH                 | 003    | 001 | 004  | 1      | MF477511         | MF477805 |
| X01a       | SPJU | RR                 | 005    | 004 | 008  | 1      | MF477512         | MF477806 |
| X01aa      | SPJU | RR                 | 003    | 001 | 008  | 1      | MF477513         | MF477807 |
| X01b       | SPJU | RR                 | 003    | 001 | 008  | 1      | MF477514         | MF477808 |
| X01bb      | SPJU | RR                 | 003    | 001 | 004  | 1      | MF477515         | MF477809 |
| X01d       | SPJU | RR                 | 003    | 001 | 004  | 1      | MF477516         | MF477810 |
| X01dd      | SPJU | RR                 | 003    | 001 | 005  | 1      | MF477517         | MF477811 |
| X01e       | SPJU | RR                 | 003    | 001 | 005  | 1      | MF477518         | MF477812 |
| X01ee      | SPJU | RR                 | 004    | 003 | 008  | 1      | MF477519         | MF477813 |
| X01f       | SPJU | RR                 | 003    | 001 | 004  | 1      | MF477520         | MF477814 |
| X01ff      | SPJU | RR                 | 003    | 001 | 005  | 1      | MF477521         | MF477815 |
| X01g       | SPJU | RR                 | 003    | 001 | 008  | 1      | MF477522         | MF477816 |
| X01gg      | SPJU | RR                 | 004    | 003 | 005  | 1      | MF477523         | MF477817 |
| X01h       | SPJU | RR                 | 003    | 001 | 005  | 1      | MF477524         | MF477818 |
| X01hh      | SPJU | RR                 | 004    | 003 | 005  | 1      | MF477525         | MF477819 |
| X01j       | SPJU | RR                 | 003    | 001 | 004  | 1      | MF477527         | MF477820 |
| X01jj      | SPJU | RR                 | 004    | 003 | 005  | 1      | MF477528         | MF477821 |
| X01k       | SPJU | RR                 | 003    | 001 | 008  | 1      | MF477529         | MF477822 |
| X01ll      | SPJU | RR                 | 003    | 001 | 008  | 1      | MF477530         | MF477823 |
| X01m       | SPJU | RR                 | 004    | 003 | 008  | 1      | MF477531         | MF477824 |
| X01n       | SPJU | RR                 | 003    | 001 | 008  | 1      | MF477533         | MF477825 |
| X01nn      | SPJU | RR                 | 003    | 001 | 005  | 1      | MF477534         | MF477826 |
| X01o       | SPJU | RR                 | 003    | 001 | 005  | 1      | MF477535         | MF477827 |
| X01p       | SPJU | RR                 | 003    | 001 | 004  | 1      | MF477536         | MF477828 |
| X01r       | SPJU | RR                 | 003    | 003 | 004  | 1      | MF477538         | MF477829 |
| X01s       | SPJU | RR                 | 003    | 001 | 005  | 1      | MF477539         | MF477830 |
| X01u       | SPJU | RR                 | 004    | 003 | 015  | 1      | MF477540         | MF477831 |
| X01w       | SPJU | RR                 | 003    | 001 | 004  | 1      | MF477541         | MF477832 |
| X01y       | SPJU | RR                 | 003    | 001 | 008  | 1      | MF477542         | MF477833 |
| X01z       | SPJU | RR                 | 019    | 032 | 004  | 1      | MF477543         | MF477834 |
| 05LoH15.1  | ACHE | Bodegea            | 001    | 001 | 003  | 2      | KM195661.1       | -        |
| 05LoH15.10 | ACHE | Bodegea            | 001    | 001 | 002  | 2      | -                | -        |
| 05LoH15.11 | ACHE | Bodegea            | 001    | 001 | 003  | 2      | -                | -        |
| 05LoH15.12 | ACHE | Bodegea            | 001    | 001 | 003  | 2      | -                | -        |
| 05LoH15.2  | ACHE | Bodegea            | 001    | 001 | 003  | 2      | -                | -        |

Table S1. Continued from previous page.

| Isolate    | Host | Collection Site | OTU ID |     |      | Source | Genbank Acc. No. |            |
|------------|------|-----------------|--------|-----|------|--------|------------------|------------|
|            |      |                 | conc   | ITS | nifD |        | ITS              | nifD       |
| 05LoH15.3  | ACHE | Bodegea         | 001    | 001 | 002  | 2      | -                | -          |
| 05LoH15.4  | ACHE | Bodegea         | 001    | 001 | 002  | 2      | -                | -          |
| 05LoH15.5  | ACHE | Bodegea         | 001    | 001 | 002  | 2      | -                | -          |
| 05LoH15.6  | ACHE | Bodegea         | 001    | 001 | 002  | 2      | -                | -          |
| 05LoH15.7  | ACHE | Bodegea         | 001    | 001 | 003  | 2      | -                | -          |
| 05LoH15.8  | ACHE | Bodegea         | 001    | 001 | 002  | 2      | -                | -          |
| 05LoH15.9  | ACHE | Bodegea         | 001    | 001 | 003  | 2      | -                | -          |
| 05LoH17.10 | ACHE | Bodegea         | 001    | 001 | 003  | 2      | -                | -          |
| 05LoH17.11 | ACHE | Bodegea         | 001    | 001 | 003  | 2      | -                | -          |
| 05LoH17.12 | ACHE | Bodegea         | 001    | 001 | 002  | 2      | -                | -          |
| 05LoH17.13 | ACHE | Bodegea         | 001    | 001 | 002  | 2      | -                | -          |
| 05LoH17.14 | ACHE | Bodegea         | 001    | 001 | 002  | 2      | -                | -          |
| 05LoH17.3  | ACHE | Bodegea         | 001    | 001 | 002  | 2      | -                | -          |
| 05LoH17.4  | ACHE | Bodegea         | 001    | 001 | 003  | 2      | -                | -          |
| 05LoH17.6  | ACHE | Bodegea         | 001    | 001 | 003  | 2      | -                | -          |
| 05LoH17.7  | ACHE | Bodegea         | 001    | 001 | 003  | 2      | -                | -          |
| 05LoH17.8  | ACHE | Bodegea         | 001    | 001 | 003  | 2      | -                | -          |
| 05LoH17.9  | ACHE | Bodegea         | 001    | 001 | 003  | 2      | -                | -          |
| 05LoH34.1  | ACHE | Sonoma          | 001    | 001 | 002  | 2      | -                | -          |
| 05LoH34.5  | ACHE | Sonoma          | 001    | 001 | 002  | 2      | -                | -          |
| 05LoH34.9  | ACHE | Sonoma          | 001    | 001 | 002  | 2      | -                | -          |
| 05LoM26.10 | ACMI | Sonoma          | 001    | 001 | 010  | 2      | -                | -          |
| 05LoM26.3  | ACMI | Sonoma          | 001    | 001 | 010  | 2      | -                | KM195562.1 |
| 05LoM26.4  | ACMI | Sonoma          | 001    | 001 | 010  | 2      | -                | -          |
| 05LoM26.5  | ACMI | Sonoma          | 001    | 001 | 010  | 2      | -                | KM195563.1 |
| 05LoM26.8  | ACMI | Sonoma          | 001    | 001 | 010  | 2      | -                | -          |
| 05LoM26.9  | ACMI | Sonoma          | 001    | 001 | 010  | 2      | -                | -          |
| 05LoM27.1  | ACMI | Sonoma          | 001    | 001 | 002  | 2      | -                | -          |
| 05LoM28.1  | ACMI | Sonoma          | 001    | 001 | 002  | 2      | -                | -          |
| 05LoM28.2  | ACMI | Sonoma          | 001    | 001 | 002  | 2      | -                | -          |
| 05LoM28.7  | ACMI | Sonoma          | 001    | 001 | 002  | 2      | -                | -          |
| 05LoM28.8  | ACMI | Sonoma          | 001    | 001 | 002  | 2      | -                | -          |
| 05LoS1.2   | ACST | Bodega          | 001    | 001 | 002  | 2      | KM195612.1       | KP832997.1 |
| 05LoS1.8   | ACST | Bodega          | 001    | 001 | 002  | 2      | KM195618.1       | KP833003.1 |
| 05LoS11.1  | ACST | Bodega          | 001    | 001 | 002  | 2      | KM195634.1       | KP833014.1 |
| 05LoS11.14 | ACST | Bodega          | 001    | 001 | 002  | 2      | KM195636.1       | KP833016.1 |
| 05LoS11.5  | ACST | Bodega          | 001    | 001 | 002  | 2      | KM195635.1       | KP833015.1 |
| 05LoS14.1  | ACST | Bodega          | 001    | 001 | 003  | 2      | KM195641.1       | KP833021.1 |
| 05LoS14.10 | ACST | Bodega          | 001    | 001 | 002  | 2      | KM195650.1       | KP833030.1 |
| 05LoS14.11 | ACST | Bodega          | 001    | 001 | 003  | 2      | KM195651.1       | KP833031.1 |
| 05LoS14.12 | ACST | Bodega          | 001    | 001 | 003  | 2      | KM195652.1       | KP833032.1 |
| 05LoS14.13 | ACST | Bodega          | 001    | 001 | 003  | 2      | KM195653.1       | KP833033.1 |
| 05LoS14.15 | ACST | Bodega          | 001    | 001 | 003  | 2      | KM195655.1       | KP833035.1 |
| 05LoS14.2  | ACST | Bodega          | 001    | 001 | 003  | 2      | KM195642.1       | KP833022.1 |



Table S1. Continued from previous page.

| Isolate    | Host | Collection<br>Site | OTU ID |     |      | Source | Genbank Acc. No. |            |
|------------|------|--------------------|--------|-----|------|--------|------------------|------------|
|            |      |                    | conc   | ITS | nifD |        | ITS              | nifD       |
| 05LoS14.3  | ACST | Bodega             | 001    | 001 | 003  | 2      | KM195643.1       | KP833023.1 |
| 05LoS14.4  | ACST | Bodega             | 001    | 001 | 003  | 2      | KM195644.1       | KP833024.1 |
| 05LoS14.5  | ACST | Bodega             | 001    | 001 | 003  | 2      | KM195645.1       | KP833025.1 |
| 05LoS14.6  | ACST | Bodega             | 001    | 001 | 003  | 2      | KM195646.1       | KP833026.1 |
| 05LoS14.7  | ACST | Bodega             | 001    | 001 | 003  | 2      | KM195647.1       | KP833027.1 |
| 05LoS14.8  | ACST | Bodega             | 001    | 001 | 003  | 2      | KM195648.1       | KP833028.1 |
| 05LoS16.1  | ACST | Bodega             | 001    | 001 | 003  | 2      | KM195667.1       | KP833036.1 |
| 05LoS16.11 | ACST | Bodega             | 001    | 001 | 002  | 2      | KM195675.1       | KP833044.1 |
| 05LoS16.14 | ACST | Bodega             | 001    | 001 | 002  | 2      | KM195678.1       | KP833047.1 |
| 05LoS16.15 | ACST | Bodega             | 001    | 001 | 003  | 2      | KM195679.1       | KP833048.1 |
| 05LoS16.16 | ACST | Bodega             | 001    | 001 | 003  | 2      | KM195680.1       | KP833049.1 |
| 05LoS16.17 | ACST | Bodega             | 001    | 001 | 002  | 2      | KM195681.1       | KP833050.1 |
| 05LoS16.18 | ACST | Bodega             | 001    | 001 | 002  | 2      | KM195682.1       | KP833051.1 |
| 05Los16.19 | ACST | Bodega             | 001    | 001 | 003  | 2      | KM195683.1       | KP833052.1 |
| 05LoS16.2  | ACST | Bodega             | 001    | 001 | 003  | 2      | KM195668.1       | KP833037.1 |
| 05LoS16.3  | ACST | Bodega             | 001    | 001 | 003  | 2      | KM195669.1       | KP833038.1 |
| 05Los16.6  | ACST | Bodega             | 001    | 001 | 003  | 2      | KM195670.1       | KP833039.1 |
| 05LoS16.7  | ACST | Bodega             | 001    | 001 | 002  | 2      | KM195671.1       | KP833040.1 |
| 05LoS16.8  | ACST | Bodega             | 001    | 001 | 002  | 2      | KM195672.1       | KP833041.1 |
| 05LoS2.2   | ACST | Bodega             | 001    | 001 | 002  | 2      | KM195619.1       | KP833004.1 |
| 05LoS2.3   | ACST | Bodega             | 001    | 001 | 002  | 2      | KM195620.1       | KP833005.1 |
| 05LoS20.1  | ACST | Bodega             | 001    | 001 | 002  | 2      | KM195696.1       | KP833053.1 |
| 05LoS20.2  | ACST | Bodega             | 001    | 001 | 002  | 2      | KM195697.1       | KP833054.1 |
| 05LoS20.3  | ACST | Bodega             | 001    | 001 | 002  | 2      | KM195698.1       | KP833055.1 |
| 05LoS20.4  | ACST | Bodega             | 001    | 001 | 002  | 2      | KM195699.1       | KP833056.1 |
| 05LoS20.5  | ACST | Bodega             | 001    | 001 | 002  | 2      | KM195700.1       | KP833057.1 |
| 05LoS20.6  | ACST | Bodega             | 001    | 001 | 002  | 2      | KM195701.1       | KP833058.1 |
| 05LoS20.8  | ACST | Bodega             | 001    | 001 | 002  | 2      | KM195702.1       | KP833059.1 |
| 05LoS21.1  | ACST | Bodega             | 001    | 001 | 002  | 2      | KM195707.1       | KP833060.1 |
| 05LoS21.2  | ACST | Bodega             | 001    | 001 | 002  | 2      | KM195708.1       | KP833061.1 |
| 05LoS21.3  | ACST | Bodega             | 001    | 001 | 002  | 2      | KM195709.1       | KP833062.1 |
| 05LoS21.4  | ACST | Bodega             | 001    | 001 | 002  | 2      | KM195710.1       | KP833063.1 |
| 05LoS22.10 | ACST | Bodega             | 001    | 001 | 002  | 2      | KM195732.1       | KM195559.1 |
| 05LoS22.11 | ACST | Bodega             | 001    | 001 | 002  | 2      | KP872670.1       | KP833073.1 |
| 05LoS22.12 | ACST | Bodega             | 001    | 001 | 002  | 2      | KM195733.1       | KP833074.1 |
| 05LoS22.13 | ACST | Bodega             | 001    | 001 | 002  | 2      | KM195734.1       | KP833075.1 |
| 05LoS22.2  | ACST | Bodega             | 001    | 001 | 002  | 2      | KM195724.1       | KP833065.1 |
| 05LoS22.3  | ACST | Bodega             | 001    | 001 | 002  | 2      | KM195725.1       | KP833066.1 |
| 05LoS22.4  | ACST | Bodega             | 001    | 001 | 002  | 2      | KM195726.1       | KP833067.1 |
| 05LoS22.5  | ACST | Bodega             | 001    | 001 | 002  | 2      | KM195727.1       | KP833068.1 |
| 05LoS22.6  | ACST | Bodega             | 001    | 001 | 002  | 2      | KM195728.1       | KP833069.1 |
| 05LoS22.7  | ACST | Bodega             | 001    | 001 | 002  | 2      | KM195729.1       | KP833070.1 |
| 05LoS22.8  | ACST | Bodega             | 001    | 001 | 002  | 2      | KM195730.1       | KP833071.1 |
| 05LoS22.9  | ACST | Bodega             | 001    | 001 | 002  | 2      | KM195731.1       | KP833072.1 |

Table S1. Continued from previous page.

| Isolate    | Host | Collection<br>Site | OTU ID |     |      | Source | Genbank Acc. No. |            |
|------------|------|--------------------|--------|-----|------|--------|------------------|------------|
|            |      |                    | conc   | ITS | nifD |        | ITS              | nifD       |
| 05LoS23.10 | ACST | Bodega             | 001    | 001 | 002  | 2      | KM195754.1       | KP833083.1 |
| 05LoS23.11 | ACST | Bodega             | 001    | 001 | 002  | 2      | KM195755.1       | KP833084.1 |
| 05LoS23.12 | ACST | Bodega             | 001    | 001 | 002  | 2      | KM195756.1       | KP833085.1 |
| 05LoS23.2  | ACST | Bodega             | 001    | 001 | 002  | 2      | KM195747.1       | KP833076.1 |
| 05LoS23.3  | ACST | Bodega             | 001    | 001 | 002  | 2      | KM195748.1       | KP833077.1 |
| 05LoS23.5  | ACST | Bodega             | 001    | 001 | 002  | 2      | KM195749.1       | KP833078.1 |
| 05LoS23.6  | ACST | Bodega             | 001    | 001 | 002  | 2      | KM195750.1       | KP833079.1 |
| 05LoS23.7  | ACST | Bodega             | 001    | 001 | 002  | 2      | KM195751.1       | KP833080.1 |
| 05LoS23.8  | ACST | Bodega             | 001    | 001 | 002  | 2      | KM195752.1       | KP833081.1 |
| 05LoS23.9  | ACST | Bodega             | 001    | 001 | 002  | 2      | KM195753.1       | KP833082.1 |
| 05LoS24.1  | ACST | Bodega             | 001    | 001 | 002  | 2      | KM195566.1       | KP833086.1 |
| 05LoS24.2  | ACST | Bodega             | 001    | 001 | 002  | 2      | KM195567.1       | KP833087.1 |
| 05LoS24.3  | ACST | Bodega             | 001    | 001 | 002  | 2      | KM195568.1       | KP833088.1 |
| 05LoS24.5  | ACST | Bodega             | 001    | 001 | 002  | 2      | KM195569.1       | KP833089.1 |
| 05LoS24.6  | ACST | Bodega             | 001    | 001 | 002  | 2      | KM195570.1       | KP833090.1 |
| 05LoS25.1  | ACST | Bodega             | 001    | 001 | 002  | 2      | KM195783.6       | KP833091.1 |
| 05LoS25.10 | ACST | Bodega             | 001    | 001 | 002  | 2      | KM195792.1       | KP833098.1 |
| 05LoS25.2  | ACST | Bodega             | 001    | 001 | 002  | 2      | KM195784.6       | -          |
| 05LoS25.3  | ACST | Bodega             | 001    | 001 | 002  | 2      | KM195785.5       | KP833092.1 |
| 05LoS25.4  | ACST | Bodega             | 001    | 001 | 002  | 2      | KM195786.4       | -          |
| 05LoS25.5  | ACST | Bodega             | 001    | 001 | 002  | 2      | KM195787.3       | KP833093.1 |
| 05LoS25.6  | ACST | Bodega             | 001    | 001 | 002  | 2      | KM195788.2       | KP833094.1 |
| 05LoS25.7  | ACST | Bodega             | 001    | 001 | 002  | 2      | KM195789.1       | KP833095.1 |
| 05LoS25.8  | ACST | Bodega             | 001    | 001 | 002  | 2      | KM195790.0       | KP833096.1 |
| 05LoS25.9  | ACST | Bodega             | 001    | 001 | 002  | 2      | KM195791.1       | KP833097.1 |
| 05LoS3.1   | ACST | Bodega             | 001    | 001 | 002  | 2      | KM195621.1       | KM195550.1 |
| 05LoS4.2   | ACST | Bodega             | 001    | 001 | 002  | 2      | KM195624.1       | KM195551.1 |
| 05LoS4.3   | ACST | Bodega             | 001    | 001 | 002  | 2      | KM195625.1       | KP833008.1 |
| 05LoS7.3   | ACST | Bodega             | 001    | 001 | 002  | 2      | KM195628.1       | KP833009.1 |
| 05LoS7.4   | ACST | Bodega             | 001    | 001 | 002  | 2      | KM195629.1       | KM195552.1 |
| 05LoS7.9   | ACST | Bodega             | 001    | 001 | 002  | 2      | KM195630.1       | KP833010.1 |
| 05LoS8.1   | ACST | Bodega             | 001    | 001 | 002  | 2      | KM195631.1       | KP833011.1 |
| 05LoS8.14  | ACST | Bodega             | 001    | 001 | 002  | 2      | KM195633.1       | KP833013.1 |
| 05LoS8.7   | ACST | Bodega             | 001    | 001 | 002  | 2      | KM195632.1       | KP833012.1 |
| 11-1N      | LUBI | BL                 | 001    | 001 | 001  | 3      | -                | -          |
| 11-2N      | LUBI | BL                 | 001    | 001 | 001  | 3      | -                | -          |
| 11-4N      | LUBI | BL                 | 001    | 001 | 001  | 3      | -                | -          |
| 1-1N       | LUBI | BL                 | 001    | 001 | 001  | 3      | -                | -          |
| 13-1N      | LUBI | XR                 | 001    | 001 | 002  | 3      | -                | -          |
| 13-2N      | LUBI | XR                 | 001    | 001 | 002  | 3      | -                | -          |
| 13-3N      | LUBI | XR                 | 001    | 001 | 002  | 3      | -                | -          |
| 13-4N      | LUBI | XR                 | 001    | 001 | 002  | 3      | -                | -          |
| 13-5N      | LUBI | XR                 | 001    | 001 | 002  | 3      | -                | -          |
| 14-1N      | LUBI | MP                 | 002    | 002 | 017  | 3      | -                | -          |

Table S1. Continued from previous page.

| Isolate | Host | Collection<br>Site | OTU ID |     |      | Source | Genbank Acc. No. |      |
|---------|------|--------------------|--------|-----|------|--------|------------------|------|
|         |      |                    | conc   | ITS | nifD |        | ITS              | nifD |
| 14-2N   | LUBI | MP                 | 002    | 002 | 001  | 3      | -                | -    |
| 14-3N   | LUBI | MP                 | 001    | 001 | 014  | 3      | -                | -    |
| 14-4N   | LUBI | MP                 | 002    | 002 | 001  | 3      | -                | -    |
| 15-1N   | LUBI | BL                 | 002    | 002 | 003  | 3      | -                | -    |
| 15-2N   | LUBI | BL                 | 001    | 001 | 002  | 3      | -                | -    |
| 15-4N   | LUBI | BL                 | 002    | 002 | 003  | 3      | -                | -    |
| 1-5N    | LUBI | BL                 | 002    | 002 | 003  | 3      | -                | -    |
| 16-1N   | LUBI | XR                 | 001    | 001 | 003  | 3      | -                | -    |
| 16-2N   | LUBI | XR                 | 001    | 001 | 002  | 3      | -                | -    |
| 16-3N   | LUBI | XR                 | 015    | 014 | 025  | 3      | -                | -    |
| 16-4N   | LUBI | XR                 | 001    | 001 | 002  | 3      | -                | -    |
| 16-5N   | LUBI | XR                 | 001    | 001 | 002  | 3      | -                | -    |
| 17-1N   | LUBI | MP                 | 002    | 002 | 001  | 3      | -                | -    |
| 17-2N   | LUBI | MP                 | 002    | 002 | 001  | 3      | -                | -    |
| 17-3N   | LUBI | MP                 | 002    | 002 | 001  | 3      | -                | -    |
| 17-4N   | LUBI | MP                 | 002    | 002 | 017  | 3      | -                | -    |
| 17-5N   | LUBI | MP                 | 002    | 002 | 001  | 3      | -                | -    |
| 21-1N   | LUBI | XR                 | 001    | 001 | 002  | 3      | -                | -    |
| 21-2N   | LUBI | XR                 | 001    | 001 | 002  | 3      | -                | -    |
| 21-3N   | LUBI | XR                 | 001    | 001 | 002  | 3      | -                | -    |
| 21-4N   | LUBI | XR                 | 002    | 002 | 022  | 3      | -                | -    |
| 21-5N   | LUBI | XR                 | 002    | 002 | 022  | 3      | -                | -    |
| 22-1N   | ACST | XR                 | 001    | 001 | 002  | 3      | -                | -    |
| 2-2N    | ACST | XR                 | 001    | 001 | 003  | 3      | -                | -    |
| 23-1N   | ACST | MP                 | 002    | 002 | 001  | 3      | -                | -    |
| 2-3N    | ACST | XR                 | 015    | 014 | 025  | 3      | -                | -    |
| 24-1N   | ACST | XR                 | 001    | 001 | 002  | 3      | -                | -    |
| 24-2N   | ACST | XR                 | 001    | 001 | 003  | 3      | -                | -    |
| 24-3N   | ACST | XR                 | 001    | 001 | 002  | 3      | -                | -    |
| 24-4N   | ACST | XR                 | 001    | 001 | 002  | 3      | -                | -    |
| 2-4N    | ACST | XR                 | 001    | 001 | 002  | 3      | -                | -    |
| 25-1N   | LUBI | MP                 | 002    | 002 | 001  | 3      | -                | -    |
| 25-2N   | LUBI | MP                 | 002    | 002 | 017  | 3      | -                | -    |
| 26-1N   | LUBI | MP                 | 002    | 002 | 001  | 3      | -                | -    |
| 26-2N   | LUBI | MP                 | 001    | 001 | 001  | 3      | -                | -    |
| 26-3N   | LUBI | MP                 | 002    | 002 | 001  | 3      | -                | -    |
| 26-4N   | LUBI | MP                 | 002    | 002 | 001  | 3      | -                | -    |
| 26-5N   | LUBI | MP                 | 002    | 002 | 001  | 3      | -                | -    |
| 27-1N   | ACST | BL                 | 002    | 002 | 003  | 3      | -                | -    |
| 27-2N   | ACST | BL                 | 001    | 001 | 002  | 3      | -                | -    |
| 27-3N   | ACST | BL                 | 002    | 002 | 003  | 3      | -                | -    |
| 27-4N   | ACST | BL                 | 002    | 002 | 003  | 3      | -                | -    |
| 28-1N   | LUBI | MP                 | 001    | 001 | 001  | 3      | -                | -    |
| 28-2N   | LUBI | MP                 | 001    | 001 | 001  | 3      | -                | -    |

Table S1. Continued from previous page.

| Isolate | Host | Collection<br>Site | OTU ID |     |      | Source | Genbank Acc. No. |      |
|---------|------|--------------------|--------|-----|------|--------|------------------|------|
|         |      |                    | conc   | ITS | nifD |        | ITS              | nifD |
| 28-3N   | LUBI | MP                 | 008    | 002 | 016  | 3      | -                | -    |
| 28-4N   | LUBI | MP                 | 002    | 002 | 001  | 3      | -                | -    |
| 29-1N   | ACST | XR                 | 001    | 001 | 003  | 3      | -                | -    |
| 29-3N   | ACST | XR                 | 001    | 001 | 002  | 3      | -                | -    |
| 29-4N   | ACST | XR                 | 001    | 001 | 002  | 3      | -                | -    |
| 30-1N   | LUBI | XR                 | 001    | 001 | 002  | 3      | -                | -    |
| 30-2N   | LUBI | XR                 | 001    | 001 | 002  | 3      | -                | -    |
| 30-3N   | LUBI | XR                 | 001    | 001 | 002  | 3      | -                | -    |
| 30-4N   | LUBI | XR                 | 001    | 001 | 002  | 3      | -                | -    |
| 31-1N   | ACST | MP                 | 020    | 030 | 001  | 3      | -                | -    |
| 31-3N   | ACST | MP                 | 002    | 002 | 001  | 3      | -                | -    |
| 31-4N   | ACST | MP                 | 002    | 002 | 001  | 3      | -                | -    |
| 31-5N   | ACST | MP                 | 002    | 002 | 001  | 3      | -                | -    |
| 31-6N   | ACST | MP                 | 009    | 010 | 012  | 3      | -                | -    |
| 3-1N    | LUBI | XR                 | 001    | 001 | 002  | 3      | -                | -    |
| 32-1N   | LUBI | MP                 | 008    | 002 | 012  | 3      | -                | -    |
| 32-2N   | LUBI | MP                 | 002    | 002 | 001  | 3      | -                | -    |
| 32-3N   | LUBI | MP                 | 002    | 002 | 017  | 3      | -                | -    |
| 32-4N   | LUBI | MP                 | 002    | 002 | 001  | 3      | -                | -    |
| 32-5N   | LUBI | MP                 | 002    | 002 | 001  | 3      | -                | -    |
| 3-2N    | LUBI | XR                 | 001    | 001 | 003  | 3      | -                | -    |
| 33-1N   | LUBI | MP                 | 016    | 010 | 001  | 3      | -                | -    |
| 33-2N   | LUBI | MP                 | 002    | 002 | 001  | 3      | -                | -    |
| 33-3N   | LUBI | MP                 | 002    | 002 | 001  | 3      | -                | -    |
| 33-4N   | LUBI | MP                 | 002    | 002 | 001  | 3      | -                | -    |
| 33-5N   | LUBI | MP                 | 001    | 001 | 001  | 3      | -                | -    |
| 3-3N    | LUBI | XR                 | 001    | 001 | 003  | 3      | -                | -    |
| 34-1N   | LUBI | XR                 | 001    | 001 | 002  | 3      | -                | -    |
| 34-2N   | LUBI | XR                 | 001    | 001 | 002  | 3      | -                | -    |
| 34-3N   | LUBI | XR                 | 001    | 001 | 002  | 3      | -                | -    |
| 34-4N   | LUBI | XR                 | 001    | 001 | 002  | 3      | -                | -    |
| 34-5N   | LUBI | XR                 | 012    | 009 | 012  | 3      | -                | -    |
| 3-4N    | LUBI | XR                 | 001    | 001 | 002  | 3      | -                | -    |
| 35-1N   | ACST | MP                 | 002    | 002 | 017  | 3      | -                | -    |
| 35-2N   | ACST | MP                 | 002    | 002 | 017  | 3      | -                | -    |
| 35-3N   | ACST | MP                 | 002    | 002 | 001  | 3      | -                | -    |
| 35-4N   | ACST | MP                 | 002    | 002 | 001  | 3      | -                | -    |
| 35-5N   | ACST | MP                 | 008    | 002 | 016  | 3      | -                | -    |
| 36-2N   | LUBI | XR                 | 001    | 001 | 002  | 3      | -                | -    |
| 36-3N   | LUBI | XR                 | 001    | 001 | 002  | 3      | -                | -    |
| 36-4N   | LUBI | XR                 | 001    | 001 | 002  | 3      | -                | -    |
| 37-1N   | ACST | XR                 | 001    | 001 | 003  | 3      | -                | -    |
| 37-2N   | ACST | XR                 | 001    | 001 | 002  | 3      | -                | -    |
| 37-3N   | ACST | XR                 | 001    | 001 | 002  | 3      | -                | -    |

Table S1. Continued from previous page.

| Isolate | Host | Collection<br>Site | OTU ID |     |      | Source | Genbank Acc. No. |      |
|---------|------|--------------------|--------|-----|------|--------|------------------|------|
|         |      |                    | conc   | ITS | nifD |        | ITS              | nifD |
| 38-1N   | ACST | BL                 | 002    | 002 | 003  | 3      | -                | -    |
| 38-2N   | ACST | BL                 | 002    | 002 | 003  | 3      | -                | -    |
| 38-3N   | ACST | BL                 | 002    | 002 | 003  | 3      | -                | -    |
| 38-4N   | ACST | BL                 | 002    | 002 | 003  | 3      | -                | -    |
| 38-5N   | ACST | BL                 | 001    | 001 | 002  | 3      | -                | -    |
| 39-1N   | LUBI | BL                 | 001    | 001 | 001  | 3      | -                | -    |
| 39-2N   | LUBI | BL                 | 001    | 001 | 001  | 3      | -                | -    |
| 39-3N   | LUBI | BL                 | 001    | 001 | 001  | 3      | -                | -    |
| 39-5N   | LUBI | BL                 | 001    | 001 | 001  | 3      | -                | -    |
| 40-1N   | LUBI | BL                 | 001    | 001 | 002  | 3      | -                | -    |
| 40-3N   | LUBI | BL                 | 002    | 002 | 003  | 3      | -                | -    |
| 40-4N   | LUBI | BL                 | 008    | 002 | 016  | 3      | -                | -    |
| 41-1N   | LUBI | BL                 | 001    | 001 | 001  | 3      | -                | -    |
| 41-3N   | LUBI | BL                 | 001    | 001 | 001  | 3      | -                | -    |
| 41-4N   | LUBI | BL                 | 002    | 002 | 003  | 3      | -                | -    |
| 42-1N   | LUBI | MP                 | 001    | 001 | 001  | 3      | -                | -    |
| 42-2N   | LUBI | MP                 | 002    | 002 | 001  | 3      | -                | -    |
| 42-4N   | LUBI | MP                 | 009    | 010 | 012  | 3      | -                | -    |
| 42-5N   | LUBI | MP                 | 002    | 002 | 001  | 3      | -                | -    |
| 4-2N    | LUBI | BL                 | 002    | 002 | 003  | 3      | -                | -    |
| 43-1N   | LUBI | XR                 | 001    | 001 | 002  | 3      | -                | -    |
| 43-2N   | LUBI | XR                 | 001    | 001 | 003  | 3      | -                | -    |
| 43-3N   | LUBI | XR                 | 001    | 001 | 003  | 3      | -                | -    |
| 4-3N    | LUBI | BL                 | 001    | 001 | 002  | 3      | -                | -    |
| 44-1N   | LUBI | XR                 | 001    | 001 | 002  | 3      | -                | -    |
| 44-2N   | LUBI | XR                 | 001    | 001 | 023  | 3      | -                | -    |
| 44-3N   | LUBI | XR                 | 001    | 001 | 003  | 3      | -                | -    |
| 44-4N   | LUBI | XR                 | 001    | 001 | 003  | 3      | -                | -    |
| 44-5N   | LUBI | XR                 | 001    | 001 | 002  | 3      | -                | -    |
| 46-1N   | ACST | MP                 | 002    | 002 | 001  | 3      | -                | -    |
| 47-1N   | ACST | XR                 | 001    | 001 | 003  | 3      | -                | -    |
| 48-1N   | LUBI | BL                 | 002    | 002 | 003  | 3      | -                | -    |
| 48-3N   | LUBI | BL                 | 002    | 002 | 003  | 3      | -                | -    |
| 49-1N   | LUBI | XR                 | 001    | 001 | 002  | 3      | -                | -    |
| 49-2N   | LUBI | XR                 | 001    | 001 | 002  | 3      | -                | -    |
| 49-3N   | LUBI | XR                 | 012    | 009 | 012  | 3      | -                | -    |
| 49-4N   | LUBI | XR                 | 001    | 001 | 003  | 3      | -                | -    |
| 49-5N   | LUBI | XR                 | 012    | 009 | 012  | 3      | -                | -    |
| 51-1N   | ACST | MP                 | 002    | 002 | 001  | 3      | -                | -    |
| 51-2N   | ACST | MP                 | 002    | 002 | 001  | 3      | -                | -    |
| 51-3N   | ACST | MP                 | 008    | 002 | 016  | 3      | -                | -    |
| 51-4N   | ACST | MP                 | 002    | 002 | 001  | 3      | -                | -    |
| 52-1N   | ACST | MP                 | 002    | 002 | 001  | 3      | -                | -    |
| 52-3N   | ACST | MP                 | 002    | 002 | 001  | 3      | -                | -    |

Table S1. Continued from previous page.

| Isolate | Host | Collection<br>Site | OTU ID |     |      | Source | Genbank Acc. No. |      |
|---------|------|--------------------|--------|-----|------|--------|------------------|------|
|         |      |                    | conc   | ITS | nifD |        | ITS              | nifD |
| 52-4N   | ACST | MP                 | 002    | 002 | 001  | 3      | -                | -    |
| 53-1N   | LUBI | MP                 | 002    | 002 | 001  | 3      | -                | -    |
| 53-2N   | LUBI | MP                 | 002    | 002 | 001  | 3      | -                | -    |
| 53-3N   | LUBI | MP                 | 001    | 001 | 001  | 3      | -                | -    |
| 54-1N   | ACST | XR                 | 001    | 001 | 003  | 3      | -                | -    |
| 54-3N   | ACST | XR                 | 001    | 001 | 002  | 3      | -                | -    |
| 55-3N   | LUBI | MP                 | 002    | 002 | 001  | 3      | -                | -    |
| 55-4N   | LUBI | MP                 | 002    | 002 | 001  | 3      | -                | -    |
| 55-5N   | LUBI | MP                 | 001    | 001 | 001  | 3      | -                | -    |
| 56-2N   | ACST | BL                 | 002    | 002 | 003  | 3      | -                | -    |
| 56-3N   | ACST | BL                 | 002    | 002 | 003  | 3      | -                | -    |
| 56-4N   | ACST | BL                 | 001    | 001 | 002  | 3      | -                | -    |
| 57-1N   | ACST | XR                 | 001    | 001 | 002  | 3      | -                | -    |
| 57-2N   | ACST | XR                 | 001    | 001 | 003  | 3      | -                | -    |
| 57-3N   | ACST | XR                 | 001    | 001 | 002  | 3      | -                | -    |
| 57-4N   | ACST | XR                 | 001    | 001 | 002  | 3      | -                | -    |
| 57-5N   | ACST | XR                 | 001    | 001 | 002  | 3      | -                | -    |
| 59-1N   | LUBI | BL                 | 002    | 002 | 003  | 3      | -                | -    |
| 59-2N   | LUBI | BL                 | 002    | 002 | 003  | 3      | -                | -    |
| 59-3N   | LUBI | BL                 | 002    | 002 | 001  | 3      | -                | -    |
| 59-5N   | LUBI | BL                 | 001    | 001 | 002  | 3      | -                | -    |
| 6-1N    | LUBI | BL                 | 001    | 001 | 001  | 3      | -                | -    |
| 62-1N   | LUBI | MP                 | 016    | 010 | 001  | 3      | -                | -    |
| 62-2N   | LUBI | MP                 | 002    | 002 | 001  | 3      | -                | -    |
| 62-3N   | LUBI | MP                 | 002    | 002 | 001  | 3      | -                | -    |
| 62-4N   | LUBI | MP                 | 002    | 002 | 001  | 3      | -                | -    |
| 62-5N   | LUBI | MP                 | 002    | 002 | 001  | 3      | -                | -    |
| 6-2N    | LUBI | BL                 | 001    | 001 | 001  | 3      | -                | -    |
| 6-3N    | LUBI | BL                 | 002    | 002 | 003  | 3      | -                | -    |
| 64-1N   | LUBI | XR                 | 001    | 001 | 002  | 3      | -                | -    |
| 64-2N   | LUBI | XR                 | 001    | 001 | 003  | 3      | -                | -    |
| 64-5N   | LUBI | XR                 | 001    | 001 | 002  | 3      | -                | -    |
| 66-2N   | ACST | XR                 | 001    | 001 | 002  | 3      | -                | -    |
| 66-3N   | ACST | XR                 | 001    | 001 | 002  | 3      | -                | -    |
| 66-4N   | ACST | XR                 | 001    | 001 | 002  | 3      | -                | -    |
| 67-1N   | LUBI | XR                 | 001    | 001 | 002  | 3      | -                | -    |
| 67-3N   | LUBI | XR                 | 001    | 001 | 003  | 3      | -                | -    |
| 67-5N   | LUBI | XR                 | 001    | 001 | 002  | 3      | -                | -    |
| 68-2N   | LUBI | MP                 | 002    | 002 | 001  | 3      | -                | -    |
| 69-1N   | LUBI | MP                 | 002    | 002 | 001  | 3      | -                | -    |
| 69-2N   | LUBI | MP                 | 002    | 002 | 001  | 3      | -                | -    |
| 69-3N   | LUBI | MP                 | 002    | 002 | 001  | 3      | -                | -    |
| 69-4N   | LUBI | MP                 | 002    | 002 | 001  | 3      | -                | -    |
| 69-5N   | LUBI | MP                 | 002    | 002 | 001  | 3      | -                | -    |

Table S1. Continued from previous page.

| Isolate | Host | Collection<br>Site | OTU ID |     |      | Source | Genbank Acc. No. |            |
|---------|------|--------------------|--------|-----|------|--------|------------------|------------|
|         |      |                    | conc   | ITS | nifD |        | ITS              | nifD       |
| 73-1N   | ACST | XR                 | 001    | 001 | 002  | 3      | -                | -          |
| 73-3N   | ACST | XR                 | 001    | 001 | 002  | 3      | -                | -          |
| 73-4N   | ACST | XR                 | 001    | 001 | 002  | 3      | -                | -          |
| 74-1N   | LUBI | MP                 | 002    | 002 | 001  | 3      | -                | -          |
| 74-3N   | LUBI | MP                 | 002    | 002 | 001  | 3      | -                | -          |
| 75-1N   | LUBI | XR                 | 001    | 001 | 002  | 3      | -                | -          |
| 75-2N   | LUBI | XR                 | 001    | 001 | 002  | 3      | -                | -          |
| 75-3N   | LUBI | XR                 | 001    | 001 | 002  | 3      | -                | -          |
| 75-4N   | LUBI | XR                 | 012    | 009 | 012  | 3      | -                | -          |
| 75-5N   | LUBI | XR                 | 001    | 001 | 003  | 3      | -                | -          |
| 76-4N   | LUBI | BL                 | 002    | 002 | 002  | 3      | -                | -          |
| 76-5N   | LUBI | BL                 | 002    | 002 | 003  | 3      | -                | -          |
| 77-2N   | ACST | XR                 | 001    | 001 | 002  | 3      | -                | -          |
| 77-3N   | ACST | XR                 | 001    | 001 | 002  | 3      | -                | -          |
| 77-4N   | ACST | XR                 | 001    | 001 | 002  | 3      | -                | -          |
| 77-5N   | ACST | XR                 | 001    | 001 | 002  | 3      | -                | -          |
| 78-1N   | ACST | MP                 | 002    | 002 | 001  | 3      | -                | -          |
| 78-2N   | ACST | MP                 | 002    | 002 | 001  | 3      | -                | -          |
| 78-3N   | ACST | MP                 | 002    | 002 | 017  | 3      | -                | -          |
| 78-4N   | ACST | MP                 | 002    | 002 | 001  | 3      | -                | -          |
| 79-3N   | ACST | BL                 | 002    | 002 | 001  | 3      | -                | -          |
| 79-5N   | ACST | BL                 | 002    | 002 | 003  | 3      | -                | -          |
| 80-2N   | LUBI | XR                 | 002    | 002 | 022  | 3      | -                | -          |
| 80-3N   | LUBI | XR                 | 001    | 001 | 003  | 3      | -                | -          |
| 81-1N   | ACST | XR                 | 001    | 001 | 002  | 3      | -                | -          |
| 8-1N    | ACST | XR                 | 001    | 001 | 002  | 3      | -                | -          |
| 82-1N   | ACST | MP                 | 002    | 002 | 001  | 3      | -                | -          |
| 82-4N   | ACST | MP                 | 002    | 002 | 001  | 3      | -                | -          |
| 8-2N    | ACST | XR                 | 001    | 001 | 002  | 3      | -                | -          |
| 86-1N   | LUBI | MP                 | 002    | 002 | 001  | 3      | -                | -          |
| 86-2N   | LUBI | MP                 | 002    | 002 | 001  | 3      | -                | -          |
| 86-3N   | LUBI | MP                 | 002    | 002 | 001  | 3      | -                | -          |
| 86-4N   | LUBI | MP                 | 002    | 002 | 001  | 3      | -                | -          |
| 86-5N   | LUBI | MP                 | 002    | 002 | 001  | 3      | -                | -          |
| 89-1N   | ACST | MP                 | 002    | 002 | 001  | 3      | -                | -          |
| 89-2N   | ACST | MP                 | 002    | 002 | 001  | 3      | -                | -          |
| ME_1.1  | ACST | Bodega             | 001    | 001 | 002  | 4      | JQ230720.1       | JQ230802.1 |
| ME_1.2  | ACST | Bodega             | 001    | 001 | 002  | 4      | JQ230721.1       | JQ230803.1 |
| ME_1.3  | ACST | Bodega             | 001    | 001 | 002  | 4      | JQ230722.1       | JQ230804.1 |
| ME_1.4  | ACST | Bodega             | 001    | 001 | 002  | 4      | JQ230723.1       | JQ230805.1 |
| ME_10.1 | LUBI | Bodega             | 001    | 001 | 014  | 4      | JQ230760.1       | JQ230842.1 |
| ME_10.2 | LUBI | Bodega             | 009    | 003 | 012  | 4      | JQ230761.1       | JQ230843.1 |
| ME_10.3 | LUBI | Bodega             | 002    | 002 | 001  | 4      | JQ230762.1       | JQ230844.1 |
| ME_10.4 | LUBI | Bodega             | 002    | 002 | 001  | 4      | JQ230763.1       | JQ230845.1 |

Table S1. Continued from previous page.

| Isolate | Host | Collection<br>Site | OTU ID |     |      | Source | Genbank Acc. No. |            |
|---------|------|--------------------|--------|-----|------|--------|------------------|------------|
|         |      |                    | conc   | ITS | nifD |        | ITS              | nifD       |
| ME_10.5 | LUBI | Bodega             | 002    | 002 | 001  | 4      | JQ230764.1       | JQ230846.1 |
| ME_10.6 | LUBI | Bodega             | 001    | 001 | 014  | 4      | JQ230765.1       | JQ230847.1 |
| ME_11.1 | LUBI | Bodega             | 002    | 002 | 001  | 4      | JQ230766.1       | JQ230848.1 |
| ME_11.2 | LUBI | Bodega             | 002    | 002 | 001  | 4      | JQ230767.1       | JQ230849.1 |
| ME_12.1 | LUBI | Bodega             | 001    | 001 | 001  | 4      | JQ230768.1       | JQ230850.1 |
| ME_12.2 | LUBI | Bodega             | 002    | 002 | 014  | 4      | JQ230769.1       | JQ230851.1 |
| ME_12.3 | LUBI | Bodega             | 002    | 002 | 001  | 4      | JQ230770.1       | JQ230852.1 |
| ME_12.4 | LUBI | Bodega             | 002    | 002 | 001  | 4      | JQ230771.1       | JQ230853.1 |
| ME_12.5 | LUBI | Bodega             | 002    | 002 | 001  | 4      | JQ230772.1       | JQ230854.1 |
| ME_12.6 | LUBI | Bodega             | 002    | 002 | 001  | 4      | JQ230773.1       | JQ230855.1 |
| ME_12.7 | LUBI | Bodega             | 002    | 002 | 001  | 4      | JQ230774.1       | JQ230856.1 |
| ME_13.1 | LUBI | Bodega             | 001    | 001 | 014  | 4      | JQ230775.1       | JQ230857.1 |
| ME_13.2 | LUBI | Bodega             | 002    | 002 | 001  | 4      | JQ230776.1       | JQ230858.1 |
| ME_13.3 | LUBI | Bodega             | 008    | 002 | 012  | 4      | JQ230777.1       | JQ230859.1 |
| ME_13.4 | LUBI | Bodega             | 002    | 002 | 001  | 4      | JQ230778.1       | JQ230860.1 |
| ME_13.5 | LUBI | Bodega             | 008    | 002 | 016  | 4      | JQ230779.1       | JQ230861.1 |
| ME_14.2 | LUAR | Bodega             | 009    | 003 | 012  | 4      | JQ230780.1       | JQ230862.1 |
| ME_14.4 | LUAR | Bodega             | 009    | 003 | 012  | 4      | JQ230782.1       | JQ230864.1 |
| ME_15.1 | LUAR | Bodega             | 001    | 001 | 014  | 4      | JQ230783.1       | JQ230865.1 |
| ME_15.2 | LUAR | Bodega             | 001    | 001 | 014  | 4      | JQ230784.1       | JQ230866.1 |
| ME_16.1 | LUAR | Bodega             | 002    | 002 | 001  | 4      | JQ230785.1       | JQ230867.1 |
| ME_16.2 | LUAR | Bodega             | 002    | 002 | 001  | 4      | JQ230786.1       | JQ230868.1 |
| ME_16.3 | LUAR | Bodega             | 002    | 002 | 001  | 4      | JQ230787.1       | JQ230869.1 |
| ME_16.4 | LUAR | Bodega             | 008    | 002 | 016  | 4      | JQ230788.1       | JQ230870.1 |
| ME_16.5 | LUAR | Bodega             | 008    | 002 | 016  | 4      | JQ230789.1       | JQ230871.1 |
| ME_17.1 | LUAR | Bodega             | 002    | 002 | 001  | 4      | JQ230790.1       | JQ230872.1 |
| ME_17.2 | LUAR | Bodega             | 001    | 001 | 001  | 4      | JQ230791.1       | JQ230873.1 |
| ME_17.3 | LUAR | Bodega             | 002    | 002 | 001  | 4      | JQ230792.1       | JQ230874.1 |
| ME_17.4 | LUAR | Bodega             | 002    | 002 | 001  | 4      | JQ230793.1       | JQ230875.1 |
| ME_17.5 | LUAR | Bodega             | 001    | 001 | 001  | 4      | JQ230794.1       | JQ230876.1 |
| ME_17.6 | LUAR | Bodega             | 002    | 002 | 001  | 4      | JQ230795.1       | JQ230877.1 |
| ME_17.7 | LUAR | Bodega             | 002    | 002 | 001  | 4      | JQ230796.1       | JQ230878.1 |
| ME_17.8 | LUAR | Bodega             | 002    | 002 | 001  | 4      | JQ230797.1       | JQ230879.1 |
| ME_18.1 | LUAR | Bodega             | 009    | 003 | 012  | 4      | JQ230798.1       | JQ230880.1 |
| ME_19.1 | LUAR | Bodega             | 009    | 015 | 012  | 4      | JQ230799.1       | JQ230881.1 |
| ME_19.3 | LUAR | Bodega             | 002    | 002 | 001  | 4      | JQ230801.1       | JQ230882.1 |
| ME_2.1  | ACST | Bodega             | 001    | 001 | 002  | 4      | JQ230724.1       | JQ230806.1 |
| ME_2.2  | ACST | Bodega             | 001    | 001 | 003  | 4      | JQ230725.1       | JQ230807.1 |
| ME_2.3  | ACST | Bodega             | 001    | 001 | 002  | 4      | JQ230726.1       | JQ230808.1 |
| ME_3.1  | ACST | Bodega             | 001    | 001 | 003  | 4      | JQ230727.1       | JQ230809.1 |
| ME_3.2  | ACST | Bodega             | 001    | 001 | 003  | 4      | JQ230728.1       | JQ230810.1 |
| ME_3.3  | ACST | Bodega             | 001    | 001 | 003  | 4      | JQ230729.1       | JQ230811.1 |
| ME_3.4  | ACST | Bodega             | 001    | 001 | 003  | 4      | JQ230730.1       | JQ230812.1 |
| ME_3.5  | ACST | Bodega             | 001    | 001 | 002  | 4      | JQ230731.1       | JQ230813.1 |



Table S1. Continued from previous page.

| Isolate | Host | Collection<br>Site | OTU ID |     |      | Source | Genbank Acc. No. |            |
|---------|------|--------------------|--------|-----|------|--------|------------------|------------|
|         |      |                    | conc   | ITS | nifD |        | ITS              | nifD       |
| ME_4.2  | ACST | Bodega             | 001    | 001 | 003  | 4      | JQ230732.1       | JQ230814.1 |
| ME_4.3  | ACST | Bodega             | 001    | 001 | 002  | 4      | JQ230733.1       | JQ230815.1 |
| ME_4.4  | ACST | Bodega             | 001    | 001 | 002  | 4      | JQ230734.1       | JQ230816.1 |
| ME_4.5  | ACST | Bodega             | 001    | 001 | 002  | 4      | JQ230735.1       | JQ230817.1 |
| ME_4.6  | ACST | Bodega             | 001    | 001 | 003  | 4      | JQ230736.1       | JQ230818.1 |
| ME_5.1  | ACHE | Bodega             | 001    | 001 | 002  | 4      | JQ230738.1       | JQ230820.1 |
| ME_5.2  | ACHE | Bodega             | 001    | 001 | 002  | 4      | JQ230739.1       | JQ230821.1 |
| ME_5.3  | ACHE | Bodega             | 001    | 001 | 002  | 4      | JQ230740.1       | JQ230822.1 |
| ME_5.4  | ACHE | Bodega             | 001    | 001 | 002  | 4      | JQ230741.1       | JQ230823.1 |
| ME_5.5  | ACHE | Bodega             | 001    | 001 | 002  | 4      | JQ230742.1       | JQ230824.1 |
| ME_5.6  | ACHE | Bodega             | 001    | 009 | 002  | 4      | JQ230743.1       | JQ230825.1 |
| ME_5.7  | ACHE | Bodega             | 001    | 001 | 020  | 4      | JQ230744.1       | JQ230826.1 |
| ME_6.1  | ACHE | Bodega             | 001    | 001 | 002  | 4      | JQ230745.1       | JQ230827.1 |
| ME_6.2  | ACHE | Bodega             | 001    | 001 | 002  | 4      | JQ230746.1       | JQ230828.1 |
| ME_6.3  | ACHE | Bodega             | 001    | 001 | 002  | 4      | JQ230747.1       | JQ230829.1 |
| ME_6.4  | ACHE | Bodega             | 001    | 001 | 002  | 4      | JQ230748.1       | JQ230830.1 |
| ME_6.5  | ACHE | Bodega             | 001    | 001 | 002  | 4      | JQ230749.1       | JQ230831.1 |
| ME_7.1  | ACHE | Bodega             | 001    | 001 | 003  | 4      | JQ230750.1       | JQ230832.1 |
| ME_7.2  | ACHE | Bodega             | 001    | 001 | 002  | 4      | JQ230751.1       | JQ230833.1 |
| ME_8.1  | ACHE | Bodega             | 001    | 001 | 003  | 4      | JQ230752.1       | JQ230834.1 |
| ME_8.2  | ACHE | Bodega             | 001    | 001 | 002  | 4      | JQ230753.1       | JQ230835.1 |
| ME_8.3  | ACHE | Bodega             | 001    | 001 | 002  | 4      | JQ230754.1       | JQ230836.1 |
| ME_8.4  | ACHE | Bodega             | 001    | 001 | 003  | 4      | JQ230755.1       | JQ230837.1 |
| ME_8.5  | ACHE | Bodega             | 001    | 001 | 002  | 4      | JQ230756.1       | JQ230838.1 |
| ME_9.1  | LUBI | Bodega             | 002    | 002 | 001  | 4      | JQ230757.1       | JQ230839.1 |
| ME_9.2  | LUBI | Bodega             | 001    | 001 | 014  | 4      | JQ230758.1       | JQ230840.1 |
| ME_9.3  | LUBI | Bodega             | 001    | 001 | 001  | 4      | JQ230759.1       | JQ230841.1 |

Table S2. List of rhizobial isolates used in the nodulation assay and their origins. ACGL=*Acmispon glaber*, ACHE=*A. heermannii*, ACST=*A. strigosus*, ACWR=*A. wrangelianus*, GEMO=*Genista monspessulana*, LUAR=*Lupinus arboreus*, LUBI=*L. bicolor*, LUNA=*L. nanus*, MEPO=*Medicago polymorpha*, SPJU=*Spartium junceum*, ULEU=*Ulex europaeus*, VIsp=*Vicia* sp. Dashes indicate no molecular data is available for the isolate.

| Isolate | Isolate Taxonomy                | OTU ID |     |      | Isolate Host | Source |
|---------|---------------------------------|--------|-----|------|--------------|--------|
|         |                                 | conc   | ITS | nifD |              |        |
| P01.1a  | <i>Bradyrhizobium japonicum</i> | 001    | 004 | 002  | ACGL         | 1      |
| P01.1b  | <i>B. japonicum</i>             | 001    | 004 | 002  | ACGL         | 1      |
| P01.1c  | <i>B. japonicum</i>             | 001    | 004 | 002  | ACGL         | 1      |
| P01.1d  | <i>B. japonicum</i>             | 001    | 004 | 002  | ACGL         | 1      |
| P01.1e  | <i>B. japonicum</i>             | 001    | 003 | 020  | ACGL         | 1      |
| P01.1f  | <i>B. japonicum</i>             | 001    | 001 | 002  | ACGL         | 1      |
| 204-2N  | <i>B. japonicum</i>             | 001    | 001 | 002  | ACHE         | 3      |
| 204-4N  | <i>B. japonicum</i>             | 001    | 001 | 002  | ACHE         | 3      |
| 204-7N  | <i>B. japonicum</i>             | 023    | 013 | 002  | ACHE         | 3      |
| 204-9N  | <i>B. japonicum</i>             | -      | -   | -    | ACHE         | 3      |
| 217-1N  | <i>B. japonicum</i>             | -      | -   | -    | ACHE         | 3      |
| 217-6N  | <i>B. japonicum</i>             | 001    | 005 | 002  | ACHE         | 3      |
| 217-9N  | <i>B. japonicum</i>             | -      | -   | -    | ACHE         | 3      |
| 218-1N  | <i>B. japonicum</i>             | -      | -   | -    | ACHE         | 3      |
| 219-1N  | <i>B. japonicum</i>             | 001    | 005 | 003  | ACHE         | 3      |
| 219-2N  | <i>B. japonicum</i>             | -      | -   | -    | ACHE         | 3      |
| 219-3N  | <i>B. japonicum</i>             | -      | -   | -    | ACHE         | 3      |
| 200-10N | <i>B. japonicum</i>             | -      | -   | -    | ACST         | 3      |
| 200-4N  | <i>B. japonicum</i>             | 001    | 001 | 002  | ACST         | 3      |
| 202-10N | <i>B. japonicum</i>             | 001    | 005 | 003  | ACST         | 3      |
| 202-15  | <i>B. japonicum</i>             | -      | -   | -    | ACST         | 3      |
| 202-15N | <i>B. japonicum</i>             | -      | -   | -    | ACST         | 3      |
| 202-7N  | <i>B. japonicum</i>             | -      | -   | -    | ACST         | 3      |
| 203-13N | <i>B. japonicum</i>             | -      | -   | -    | ACST         | 3      |
| 203-1N  | <i>B. japonicum</i>             | -      | -   | -    | ACST         | 3      |
| 203-8N  | <i>B. japonicum</i>             | -      | -   | 002  | ACST         | 3      |
| 036A    | <i>Mesorhizobium</i> sp.        | -      | -   | -    | ACWR         | 4      |
| 221B    | <i>Mesorhizobium</i> sp.        | -      | -   | -    | ACWR         | 4      |
| 229A    | <i>Mesorhizobium</i> sp.        | -      | -   | -    | ACWR         | 4      |
| 232B    | <i>Mesorhizobium</i> sp.        | -      | -   | -    | ACWR         | 4      |
| 249A    | <i>Mesorhizobium</i> sp.        | -      | -   | -    | ACWR         | 4      |
| 252B    | <i>Mesorhizobium</i> sp.        | -      | -   | -    | ACWR         | 4      |
| 265A    | <i>Mesorhizobium</i> sp.        | -      | -   | -    | ACWR         | 4      |
| 280B    | <i>Mesorhizobium</i> sp.        | -      | -   | -    | ACWR         | 4      |
| 374B    | <i>Mesorhizobium</i> sp.        | -      | -   | -    | ACWR         | 4      |
| 393A    | <i>Mesorhizobium</i> sp.        | -      | -   | -    | ACWR         | 4      |
| 420B    | <i>Mesorhizobium</i> sp.        | -      | -   | -    | ACWR         | 4      |
| 555A    | <i>Mesorhizobium</i> sp.        | -      | -   | -    | ACWR         | 4      |

Table S2. Continued from previous page.

| Isolate | Isolate Taxonomy               | OTU ID |     |      | Isolate Host | Source |
|---------|--------------------------------|--------|-----|------|--------------|--------|
|         |                                | conc   | ITS | nifD |              |        |
| A11a    | <i>B. japonicum</i>            | 004    | 001 | 007  | GEMO         | 1      |
| B05a    | <i>B. japonicum</i>            | 003    | 003 | 008  | GEMO         | 1      |
| J01d    | <i>B. japonicum</i>            | 003    | 024 | 004  | GEMO         | 1      |
| J01n    | <i>B. japonicum</i>            | 001    | 005 | 010  | GEMO         | 1      |
| L01d    | <i>B. japonicum</i>            | 005    | 007 | 005  | GEMO         | 1      |
| L01j    | <i>B. japonicum</i>            | 003    | 021 | 004  | GEMO         | 1      |
| L01l    | <i>B. japonicum</i>            | 005    | 007 | 005  | GEMO         | 1      |
| P01a    | <i>B. japonicum</i>            | 006    | 009 | 015  | GEMO         | 1      |
| P01b    | <i>B. japonicum</i>            | 004    | 004 | 005  | GEMO         | 1      |
| P01o    | <i>B. japonicum</i>            | 003    | 003 | 024  | GEMO         | 1      |
| S01c    | <i>Bradyrhizobium sp.</i>      | -      | -   | 009  | GEMO         | 1      |
| S01i    | <i>Rhizobium leguminosarum</i> | -      | -   | -    | GEMO         | 1      |
| 206-3N  | <i>B. japonicum</i>            | 009    | 004 | 012  | LUAR         | 3      |
| 207-4N  | <i>B. japonicum</i>            | -      | 006 | -    | LUAR         | 3      |
| 207-5N  | <i>B. japonicum</i>            | -      | -   | -    | LUAR         | 3      |
| 208-6N  | <i>B. japonicum</i>            | 009    | 004 | 012  | LUAR         | 3      |
| 208-9N  | <i>B. japonicum</i>            | 008    | 002 | 016  | LUAR         | 3      |
| 213-14N | <i>B. japonicum</i>            | 002    | 002 | 001  | LUAR         | 3      |
| 213-1N  | <i>B. japonicum</i>            | -      | -   | -    | LUAR         | 3      |
| 213-3N  | <i>B. japonicum</i>            | -      | -   | -    | LUAR         | 3      |
| 213-4N  | <i>B. japonicum</i>            | 001    | 001 | 001  | LUAR         | 3      |
| 213-7N  | <i>B. japonicum</i>            | 002    | 002 | 001  | LUAR         | 3      |
| 215-2N  | <i>B. japonicum</i>            | 009    | 017 | 012  | LUAR         | 3      |
| 215-3N  | <i>B. japonicum</i>            | -      | 003 | -    | LUAR         | 3      |
| 205-3N  | <i>B. japonicum</i>            | 002    | 002 | 001  | LUBI         | 3      |
| 205-7N  | <i>B. japonicum</i>            | 001    | 001 | 001  | LUBI         | 3      |
| 209-10N | <i>B. japonicum</i>            | 001    | 008 | 014  | LUBI         | 3      |
| 209-1N  | <i>B. japonicum</i>            | 009    | 006 | 012  | LUBI         | 3      |
| 209-4N  | <i>B. japonicum</i>            | 002    | 002 | 001  | LUBI         | 3      |
| 209-8N  | <i>B. japonicum</i>            | 002    | 002 | 001  | LUBI         | 3      |
| 209-9N  | <i>B. japonicum</i>            | 001    | 008 | 014  | LUBI         | 3      |
| 211-11N | <i>B. japonicum</i>            | 001    | 001 | 001  | LUBI         | 3      |
| 211-12N | <i>B. japonicum</i>            | 002    | 002 | 014  | LUBI         | 3      |
| 211-6N  | <i>B. japonicum</i>            | 001    | 008 | 014  | LUBI         | 3      |
| 212-2N  | <i>B. japonicum</i>            | 002    | 002 | 001  | LUBI         | 3      |
| 212-6N  | <i>B. japonicum</i>            | 002    | 002 | 001  | LUBI         | 3      |
| LN07.5  | -                              | -      | -   | -    | LUNA         | 5      |
| LN181.3 | -                              | -      | -   | -    | LUNA         | 5      |
| LN188.4 | -                              | -      | -   | -    | LUNA         | 5      |
| LN190.4 | -                              | -      | -   | -    | LUNA         | 5      |
| LN211.3 | -                              | -      | -   | -    | LUNA         | 5      |
| LN213.5 | -                              | -      | -   | -    | LUNA         | 5      |
| LN217.3 | -                              | -      | -   | -    | LUNA         | 5      |
| LN220.3 | -                              | -      | -   | -    | LUNA         | 5      |

Table S2. Continued from previous page.

| Isolate | Isolate Taxonomy         | OTU ID |     |      | Isolate Host | Source |
|---------|--------------------------|--------|-----|------|--------------|--------|
|         |                          | conc   | ITS | nifD |              |        |
| LN223.6 | -                        | -      | -   | -    | LUNA         | 5      |
| LN226.8 | -                        | -      | -   | -    | LUNA         | 5      |
| LN233.2 | -                        | -      | -   | -    | LUNA         | 5      |
| LN244.2 | -                        | -      | -   | -    | LUNA         | 5      |
| 416C    | <i>Mesorhizobium sp.</i> | -      | -   | -    | MEPO         | 4      |
| 625A    | <i>Mesorhizobium sp.</i> | -      | -   | -    | MEPO         | 4      |
| G01c    | <i>Mesorhizobium sp.</i> | -      | -   | -    | MEPO         | 2      |
| H01v    | <i>B. japonicum</i>      | 001    | 008 | 010  | SPJU         | 1      |
| K01d    | <i>B. japonicum</i>      | 003    | 003 | 008  | SPJU         | 1      |
| K01m    | <i>B. japonicum</i>      | 003    | 003 | 004  | SPJU         | 1      |
| V01i    | <i>B. japonicum</i>      | 017    | 045 | 015  | SPJU         | 1      |
| V01o    | <i>B. japonicum</i>      | 013    | 007 | 004  | SPJU         | 1      |
| V01s    | <i>B. japonicum</i>      | -      | 040 | -    | SPJU         | 1      |
| V01t    | <i>B. japonicum</i>      | 004    | 006 | 018  | SPJU         | 1      |
| W01a    | <i>B. japonicum</i>      | -      | 043 | -    | SPJU         | 1      |
| W01e    | <i>B. japonicum</i>      | 003    | 003 | 004  | SPJU         | 1      |
| W01o    | <i>B. japonicum</i>      | 003    | 001 | 004  | SPJU         | 1      |
| X01b    | <i>B. japonicum</i>      | 003    | 005 | 008  | SPJU         | 1      |
| X01p    | <i>B. japonicum</i>      | 003    | 021 | 004  | SPJU         | 1      |
| C01b    | <i>B. japonicum</i>      | 005    | 007 | 006  | ULEU         | 1      |
| D01i    | <i>B. japonicum</i>      | 005    | 029 | 006  | ULEU         | 1      |
| E01h    | <i>B. japonicum</i>      | -      | 038 | -    | ULEU         | 1      |
| F01b    | <i>B. japonicum</i>      | 010    | 011 | 006  | ULEU         | 1      |
| M01a    | <i>B. japonicum</i>      | 003    | 003 | 005  | ULEU         | 1      |
| N01b    | <i>B. japonicum</i>      | 006    | 009 | 009  | ULEU         | 1      |
| N01n    | <i>B. japonicum</i>      | 004    | 004 | 007  | ULEU         | 1      |
| Q01a    | <i>B. japonicum</i>      | 004    | 005 | 011  | ULEU         | 1      |
| Q01p    | <i>B. japonicum</i>      | 004    | 046 | 011  | ULEU         | 1      |
| R01g    | <i>B. japonicum</i>      | 004    | 004 | 011  | ULEU         | 1      |
| R01h    | <i>B. japonicum</i>      | 014    | 030 | 011  | ULEU         | 1      |
| R01p    | <i>B. japonicum</i>      | 004    | 004 | 007  | ULEU         | 1      |
| B03.1a  | <i>R. leguminosarum</i>  | -      | -   | -    | VIsp         | 2      |
| M01.1a  | <i>R. leguminosarum</i>  | -      | -   | -    | VIsp         | 2      |
| M01.1c  | <i>R. leguminosarum</i>  | -      | -   | -    | VIsp         | 2      |

<sup>1</sup>current study, <sup>2</sup>La Pierre research collection, <sup>3</sup>Simms research collection,

<sup>4</sup> Porter research collection, <sup>5</sup> Povich research collection

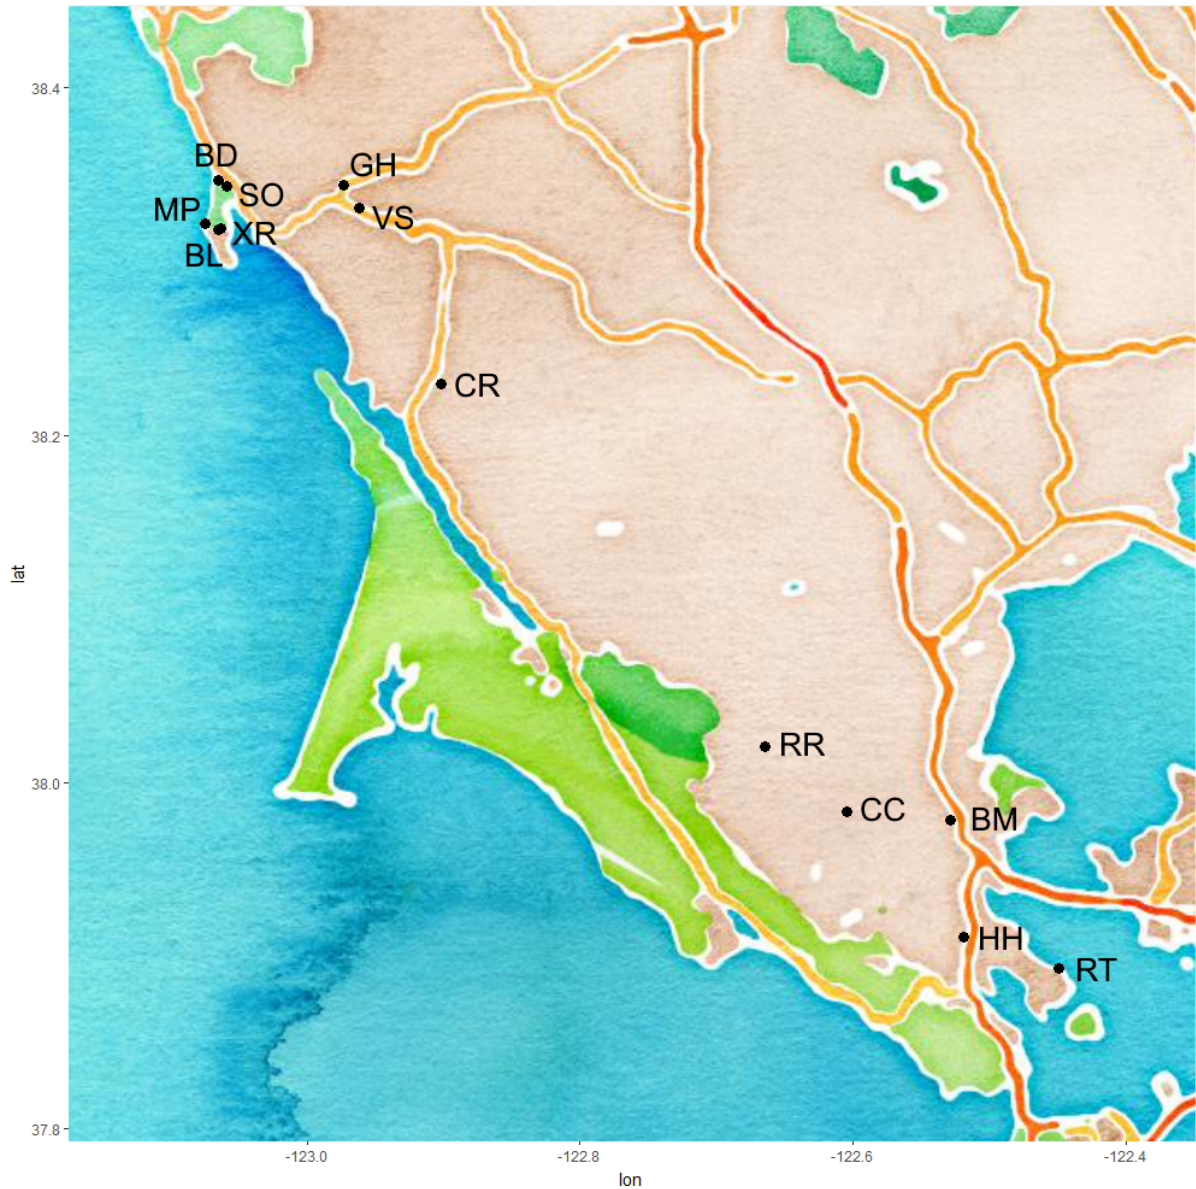

Figure S1. Map of sites used in study. Collection site codes: BL=Bunnyland, Bodega Marine and Terrestrial Reserve, Bodega Bay, CA; BM=Boyd Memorial Park, San Rafael, CA; BD=Bodega Marine and Terrestrial Reserve, Bodega Bay, CA; CC=Cascade Canyon Open Space Preserve, Fairfax, CA; CR=Colliss Family Ranch, Bodega Bay, CA; GH=private property, Bodega Bay, CA; HH=Horse Hill Open Space Preserve, Mill Valley, CA; MP=Mussel Point, Bodega Marine and Terrestrial Reserve, Bodega Bay, CA; RR=Roys Redwoods Preserve, Woodacre, CA; RT=Romburg Tiburon Center, Tiburon, CA; SO=Sonoma, CA; VS=Sonoma Coast Villa and Spa, Bodega, CA; XR=Crossroads, Bodega Marine and Terrestrial Reserve, Bodega Bay, CA.

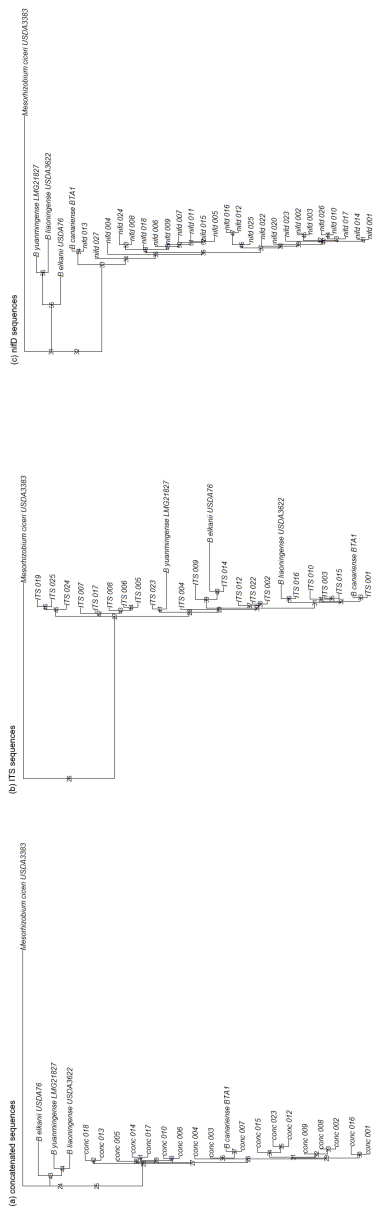

Figure S2. Bayesian trees depicting the phylogenetic relationships of operational taxonomic units identified by (a) concatenated *ITS* and *nifD* sequences, (b) *ITS* sequences, and (c) *nifD* sequences for the 841 *Bradyrhizobium* isolates assessed in this study and five reference strains. Posterior probabilities for nodes were low, likely due to recombination.

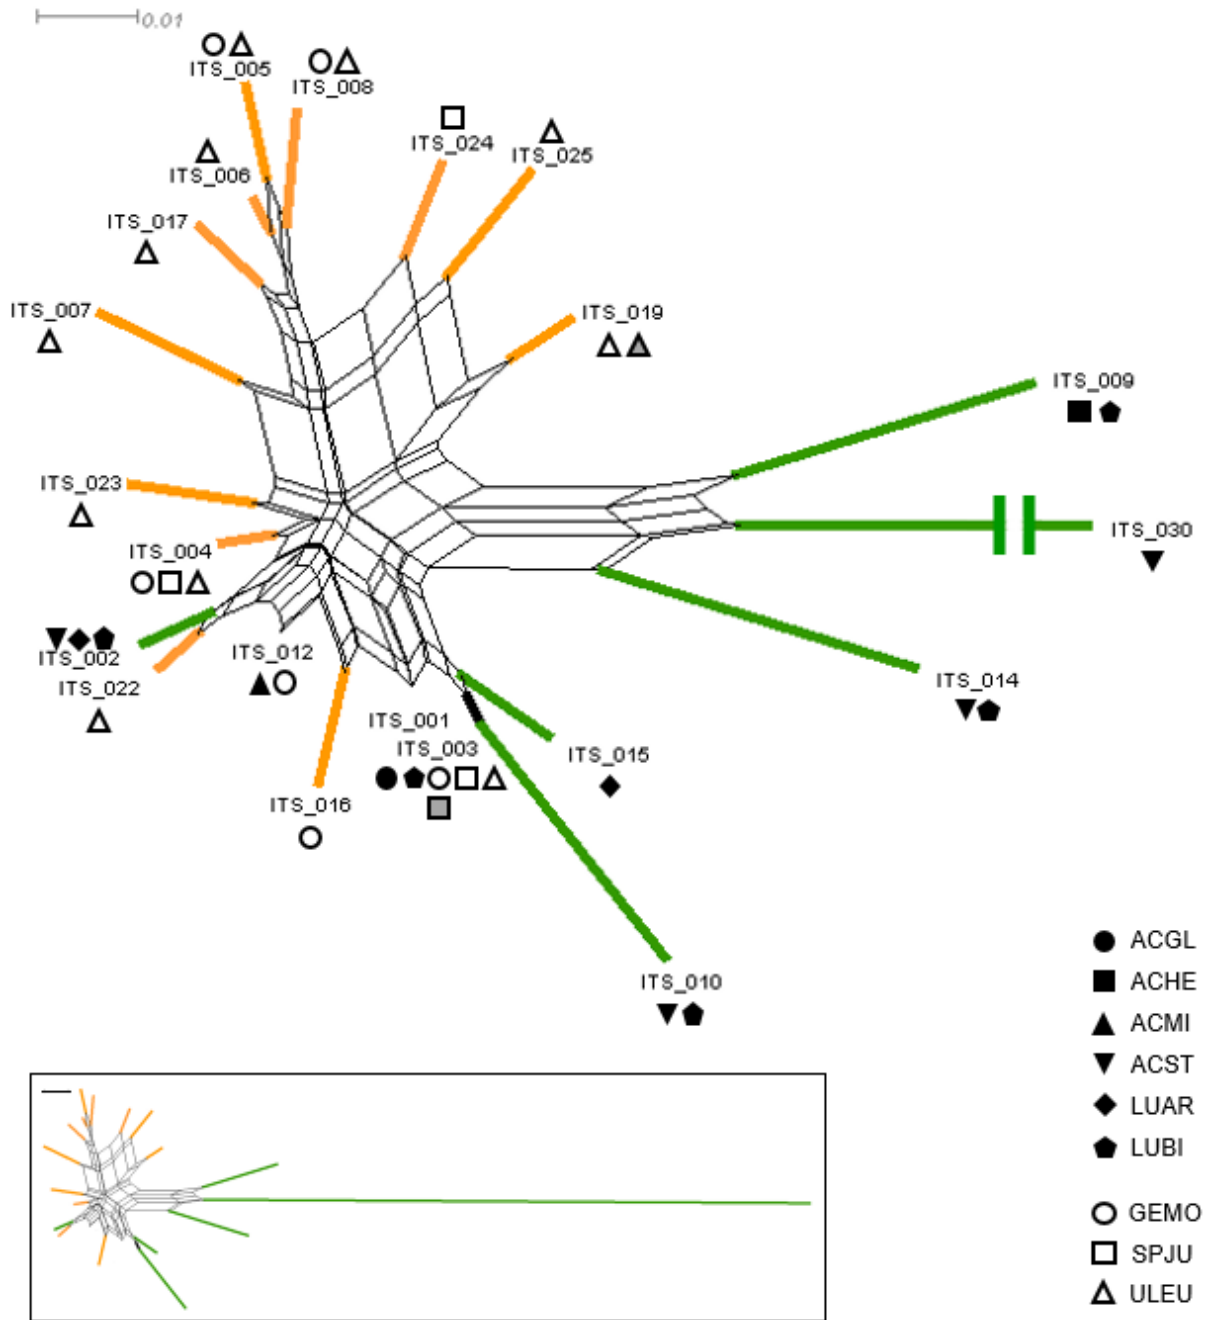

Figure S3. Neighbor-net diagram depicting the network of OTUs identified from ITS sequences. Green lines indicate the position of OTUs associated with native legume species, orange lines indicate the position of OTUs associated with invasive legume species, and black lines indicate the position of OTUs associated with both native and invasive legume species. Shapes indicate the legume species with which each OTU was associated under field conditions, with native legumes shown as black-filled shapes and invasive legumes shown as open shapes; the gray-filled shapes indicate the *ITS* isolates identified from *U. europaeus* in its native range (Portugal) and *S. junceum* in its native range (Sicily). Genotype ITS 001 was found to associate with all legume species, but for ease of visualization is not labeled. ACGL=*Acmispon glaber*, ACHE=*A. heermannii*, ACMI=*A. micranthus*, ACST=*A. strigosus*, LUAR=*Lupinus arboreous*, LUBI=*L. bicolor*, GEMO=*Genista monspessulana*, SPJU=*Spartium junceum*, ULEU=*Ulex europaeus*

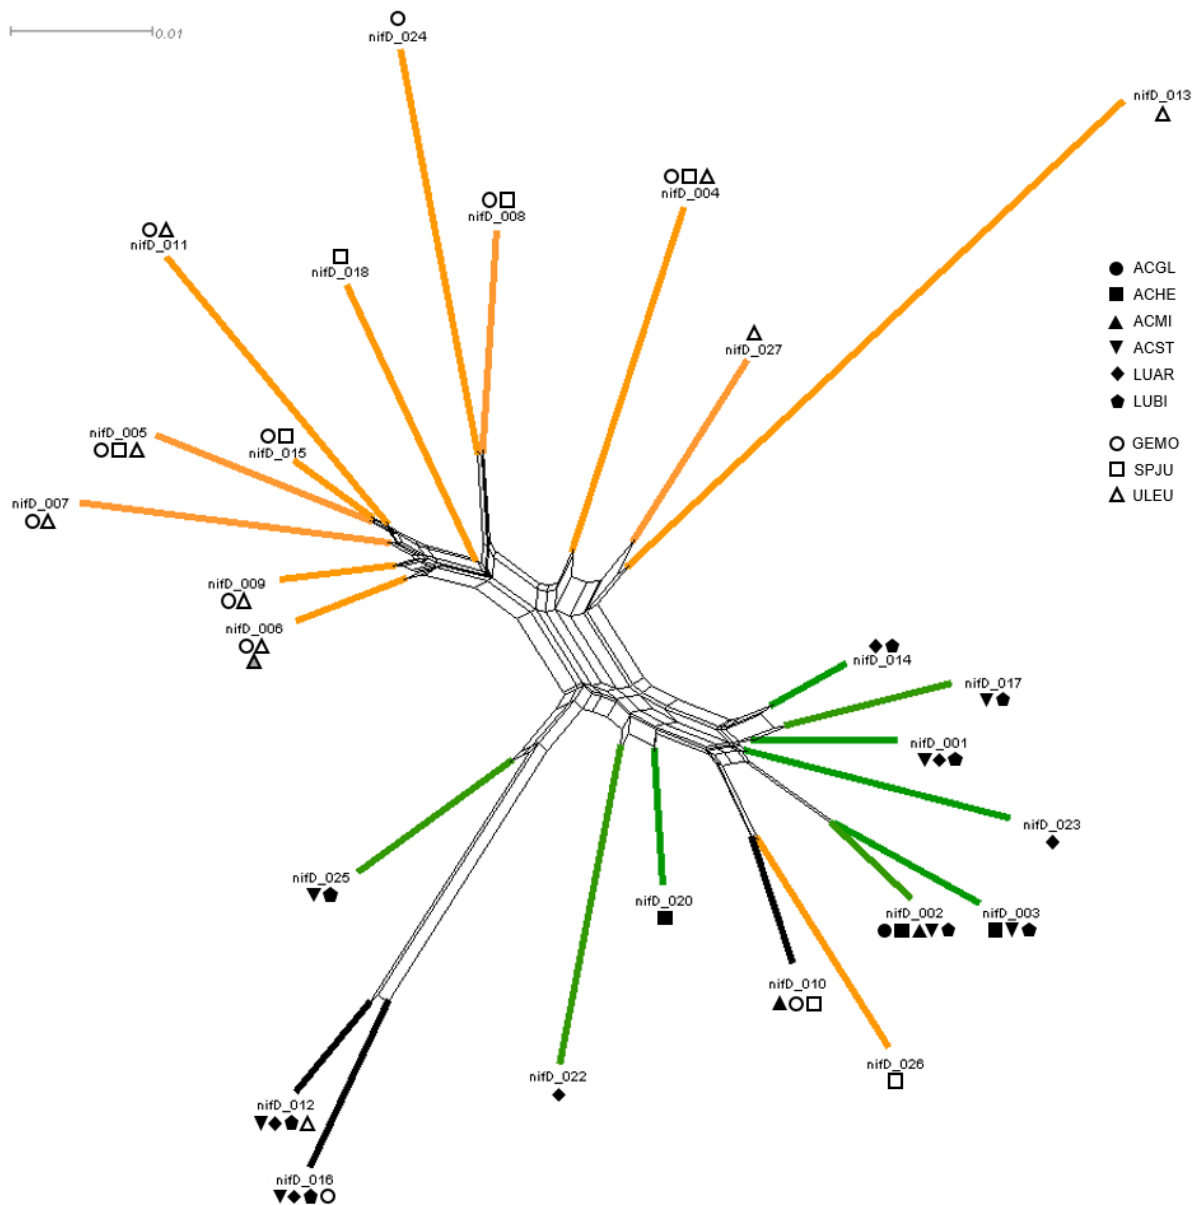

Figure S4. Neighbor-net diagram depicting the network of OTUs identified from *nifD* sequences. Green lines indicate the position of OTUs associated with native legume species, orange lines indicate the position of OTUs associated with invasive legume species, and black lines indicate the position of OTUs associated with both native and invasive legume species. Shapes indicate the legume species with which each OTU was associated under field conditions, with native legumes shown as black-filled shapes and invasive legumes shown as open shapes; the gray-filled shape indicates the single *nifD* isolates identified from *U. europaeus* in its native range (Portugal). ACGL=*Acmispon glaber*, ACHE=*A. heermannii*, ACMI=*A. micranthus*, ACST=*A. strigosus*, LUAR=*Lupinus arboreous*, LUBI=*L. bicolor*, GEMO=*Genista monspessulana*, SPJU=*Spartium junceum*, ULEU=*Ulex europaeus*



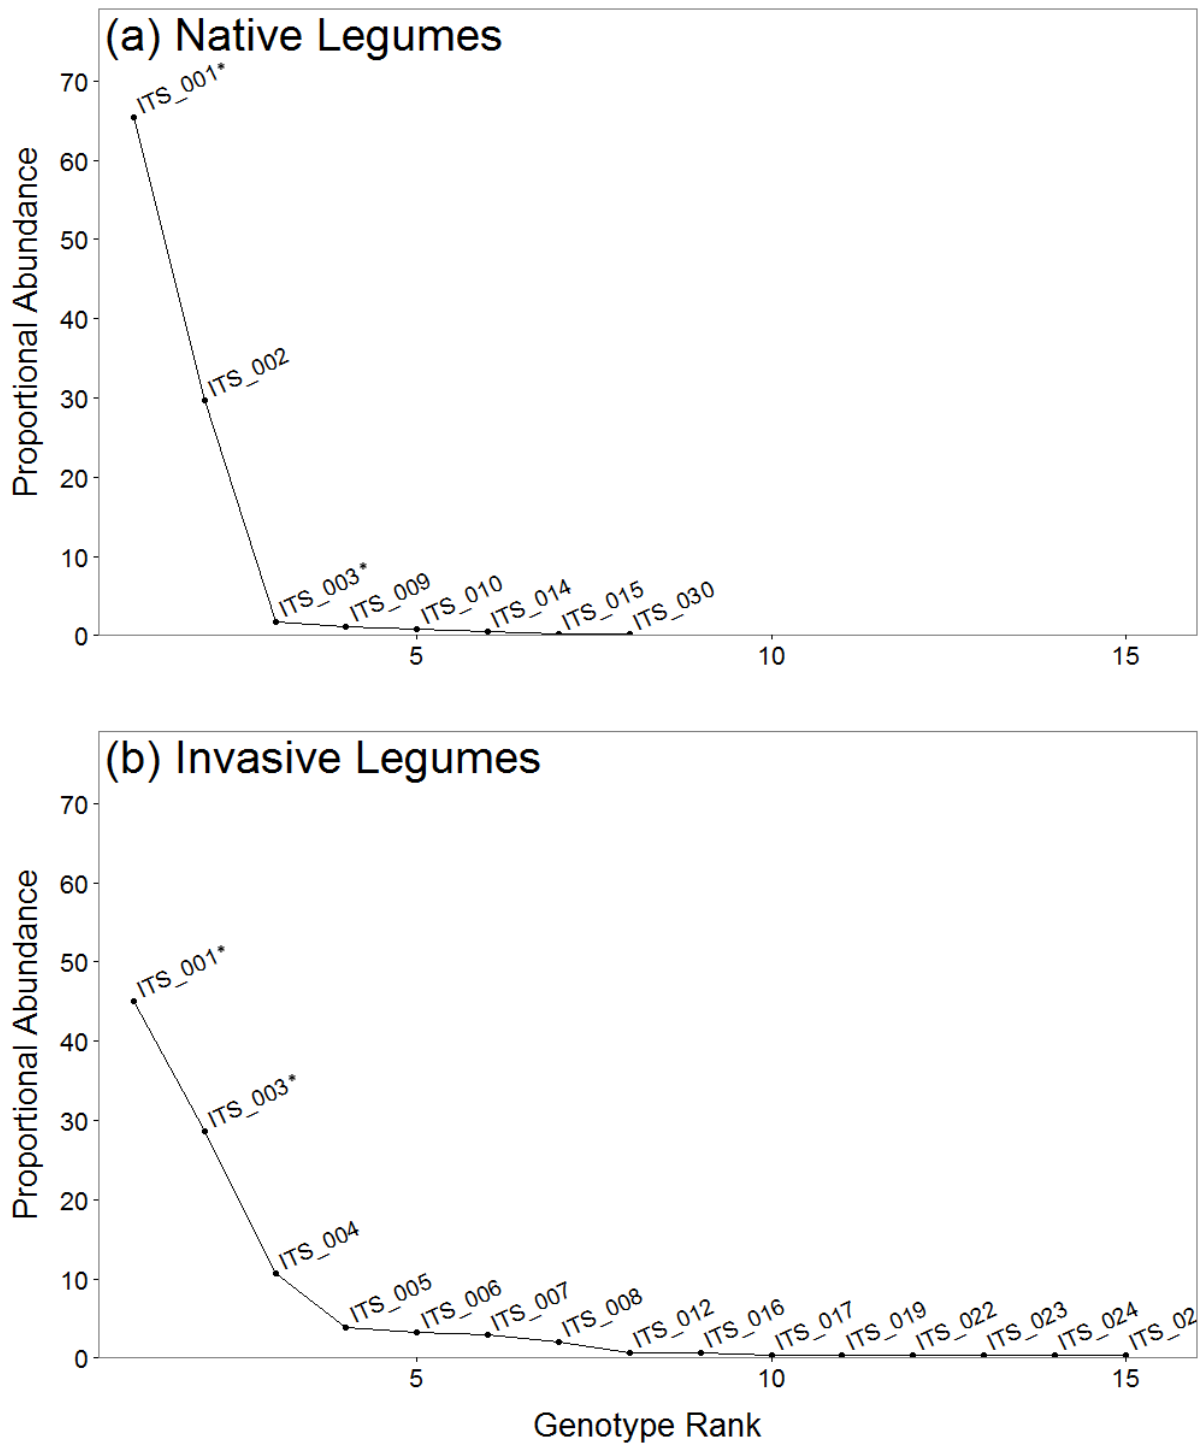

Figure S5. Rank abundance curves depicting relative abundances of OTUs associated with (a) native and (b) invasive legumes under field conditions. OTUs were identified from ITS sequences. Asterisks indicate OTUs that were found to associate with both native and invasive legumes.

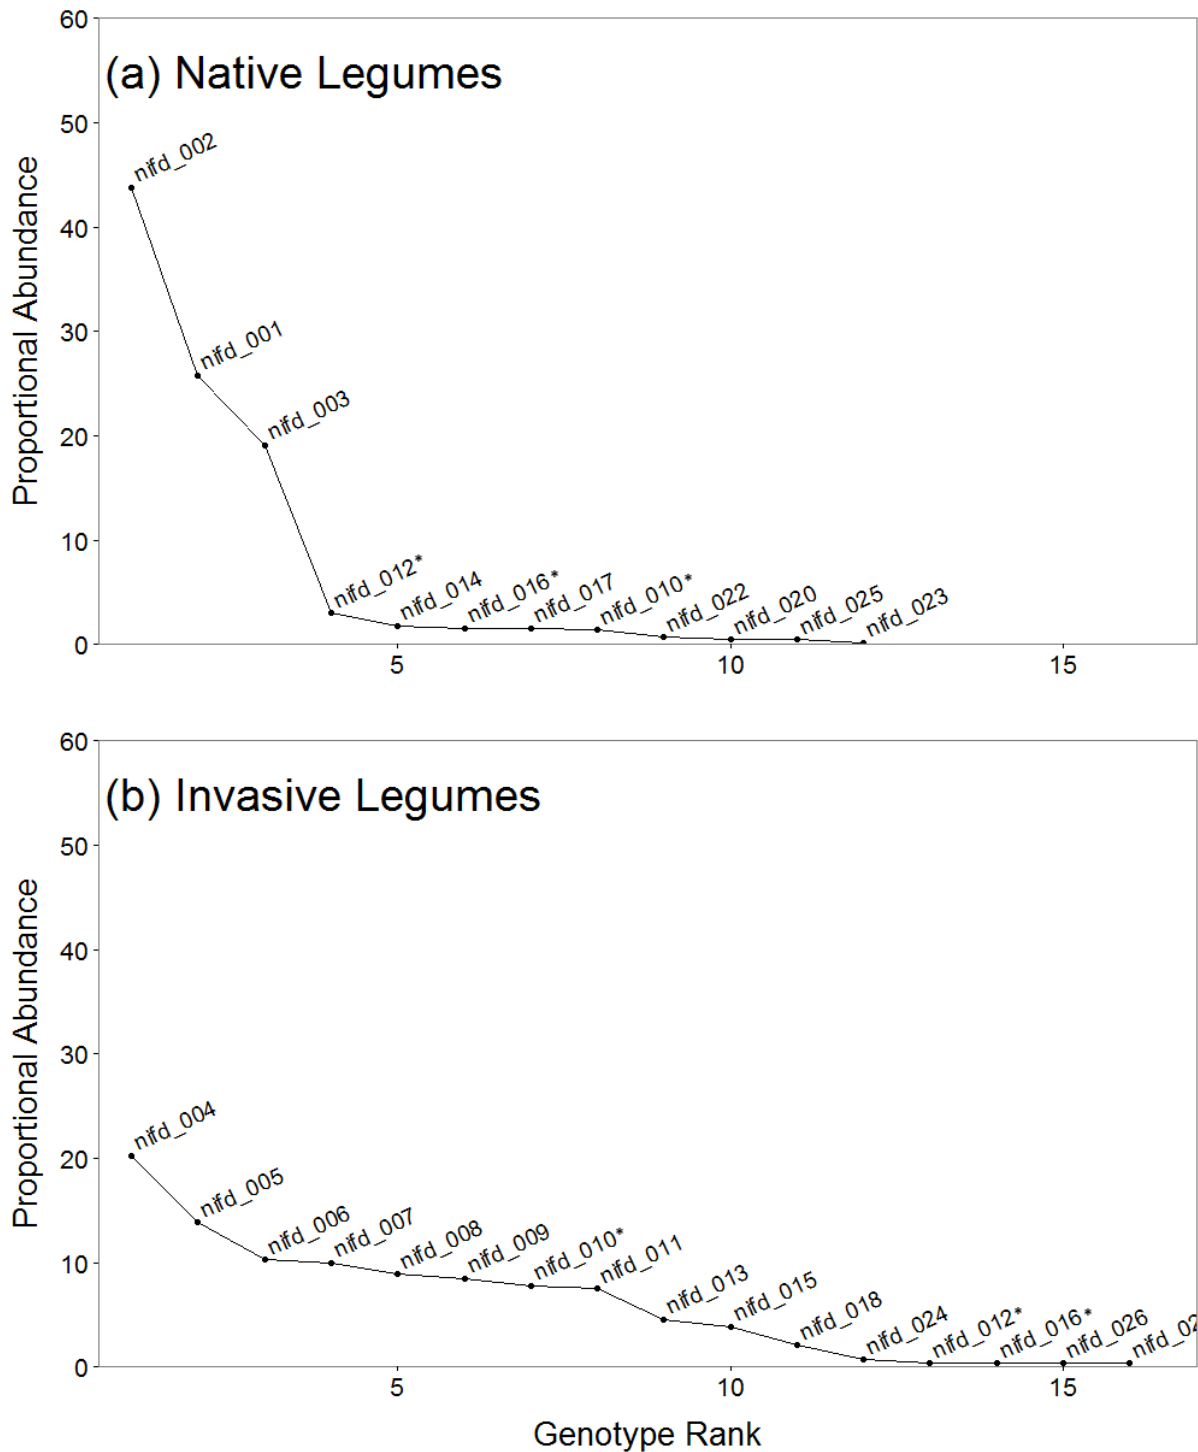

Figure S6. Rank abundance curves depicting relative abundances of OTUs associated with (a) native and (b) invasive legumes under field conditions. OTUs were identified from nifD sequences. Asterisks indicate OTUs that were found to associate with both native and invasive legumes.

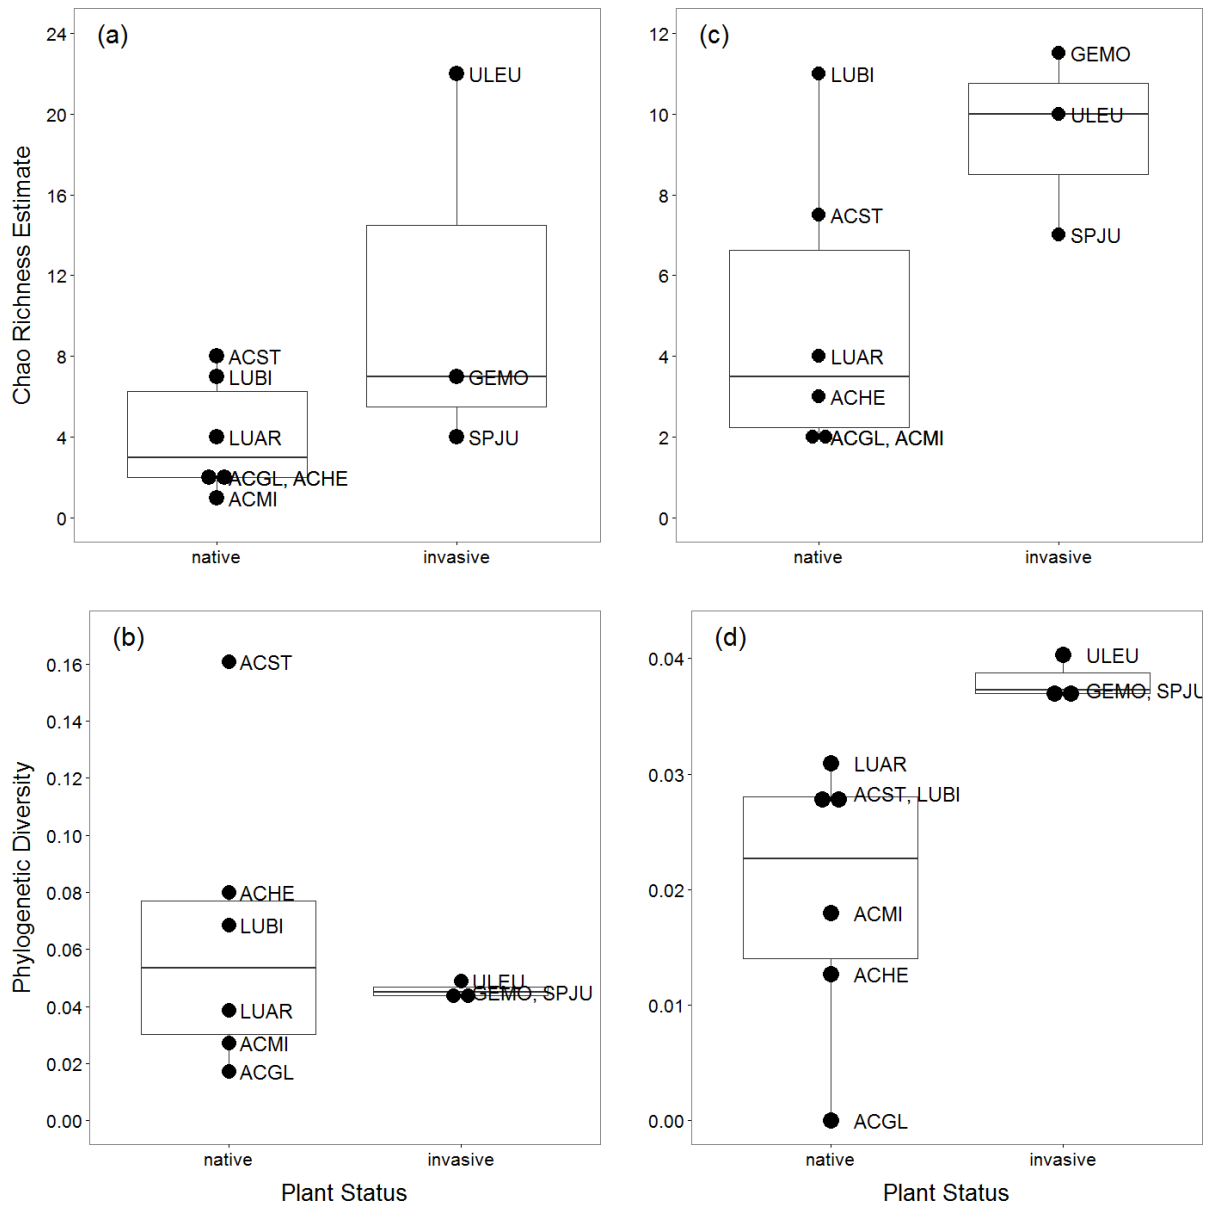

Figure S7. (a,c) Chao richness and (b,d) phylogenetic diversity estimates for OTUs identified from (a,b) ITS and (c,d) nifD sequences associated with native and invasive legume species under field conditions. ACGL=*Acmispon glaber*, ACHE=*A. heermannii*, ACMI=*A. micranthus*, ACST=*A. strigosus*, LUAR=*Lupinus arboreus*, LUBI=*L. bicolor*, GEMO=*Genista monspessulana*, SPJU=*Spartium junceum*, ULEU=*Ulex europaeus*
